## Axl as a mediator of cellular growth and survival

Haley Axelrod<sup>1,2</sup>, Kenneth J. Pienta<sup>1,2,3,4,5</sup>

<sup>1</sup>The Cellular and Molecular Medicine Program

<sup>2</sup>The James Buchanan Brady Urological Institute, Department of Urology, The Johns Hopkins School of Medicine, Baltimore, MD, USA

<sup>3</sup>Department of Oncology, The Johns Hopkins School of Medicine, Baltimore, MD, USA

<sup>4</sup>Department of Pharmacology and Molecular Sciences, The Johns Hopkins School of Medicine, Baltimore, MD, USA

<sup>5</sup>Department of Chemical and Biomolecular Engineering, Johns Hopkins University, Baltimore, MD, USA

### Correspondence to:

Ken Pienta, e-mail: kpienta1@jhmi.edu

**Keywords:** Axl, TAM receptors, Gas6, cancer, tyrosine kinase, proliferation, apoptosis, immune, migration, inhibitor

**Received:** August 06, 2014

**Accepted:** August 28, 2014

**Published:** November 11, 2014

### ABSTRACT

**The control of cellular growth and proliferation is key to the maintenance of homeostasis. Survival, proliferation, and arrest are regulated, in part, by Growth Arrest Specific 6 (Gas6) through binding to members of the TAM receptor tyrosine kinase family. Activation of the TAM receptors leads to downstream signaling through common kinases, but the exact mechanism within each cellular context varies and remains to be completely elucidated. Deregulation of the TAM family, due to its central role in mediating cellular proliferation, has been implicated in multiple diseases. Axl was cloned as the first TAM receptor in a search for genes involved in the progression of chronic to acute-phase leukemia, and has since been established as playing a critical role in the progression of cancer. The oncogenic nature of Axl is demonstrated through its activation of signaling pathways involved in proliferation, migration, inhibition of apoptosis, and therapeutic resistance. Despite its recent discovery, significant progress has been made in the development of effective clinical therapeutics targeting Axl. In order to accurately define the role of Axl in normal and diseased processes, it must be analyzed in a cell type-specific context.**

### The TAM receptor tyrosine kinase family mediates the function of protein S and Gas6

Receptor tyrosine kinases (RTKs) are classified into families based on their structural and functional properties. The TAM (Tyro3, Axl, Mer) family is set apart based on a unique extracellular domain and common ligands (Figure 1). As a Type I receptor family, their N-termini are decorated by pairs of immunoglobulin (Ig)-like and fibronectin III (FNIII) domains. At the time of their discovery, this pattern had not been observed in other RTKs. In 1991 *Axl* was cloned as the first TAM receptor in which this pattern was observed, and subsequent cloning of both *Tyro3* and *Mer* in 1994 revealed the existence of similar domains [1–3].

The TAM receptors are also grouped based on their common ligands, protein S and Gas6. While Gas6 is able to bind all three TAM receptors, however, protein S is

only able to bind Tyro3 and Mer [4]. Although there is some confusion in the literature regarding this finding, it may be due to the absence of a pattern of charged residues in protein S, which help form the major contact of the Gas6/Axl interaction [4–6]. Both ligands share 44% amino acid identity and are both vitamin K-dependent, owing to their shared  $\gamma$ -carboxyglutamic acid (Gla) domain. The Gla domain allows for cell membrane contact through calcium-dependent phospholipid binding, and is present in all vitamin K-dependent proteins [7]. Carboxylation of Gas6 and protein S is necessary for their activation of the TAM receptors, and thus inhibitors of vitamin K such as warfarin are able to block TAM receptor signaling, indicating a further level of control [8–11]. Protein S and Gas6 also share a region of homology in their four EGF-like domains, which mediate cell-cell communication [12, 13]. Physiologic differences between the two proteins are that Gas6 is

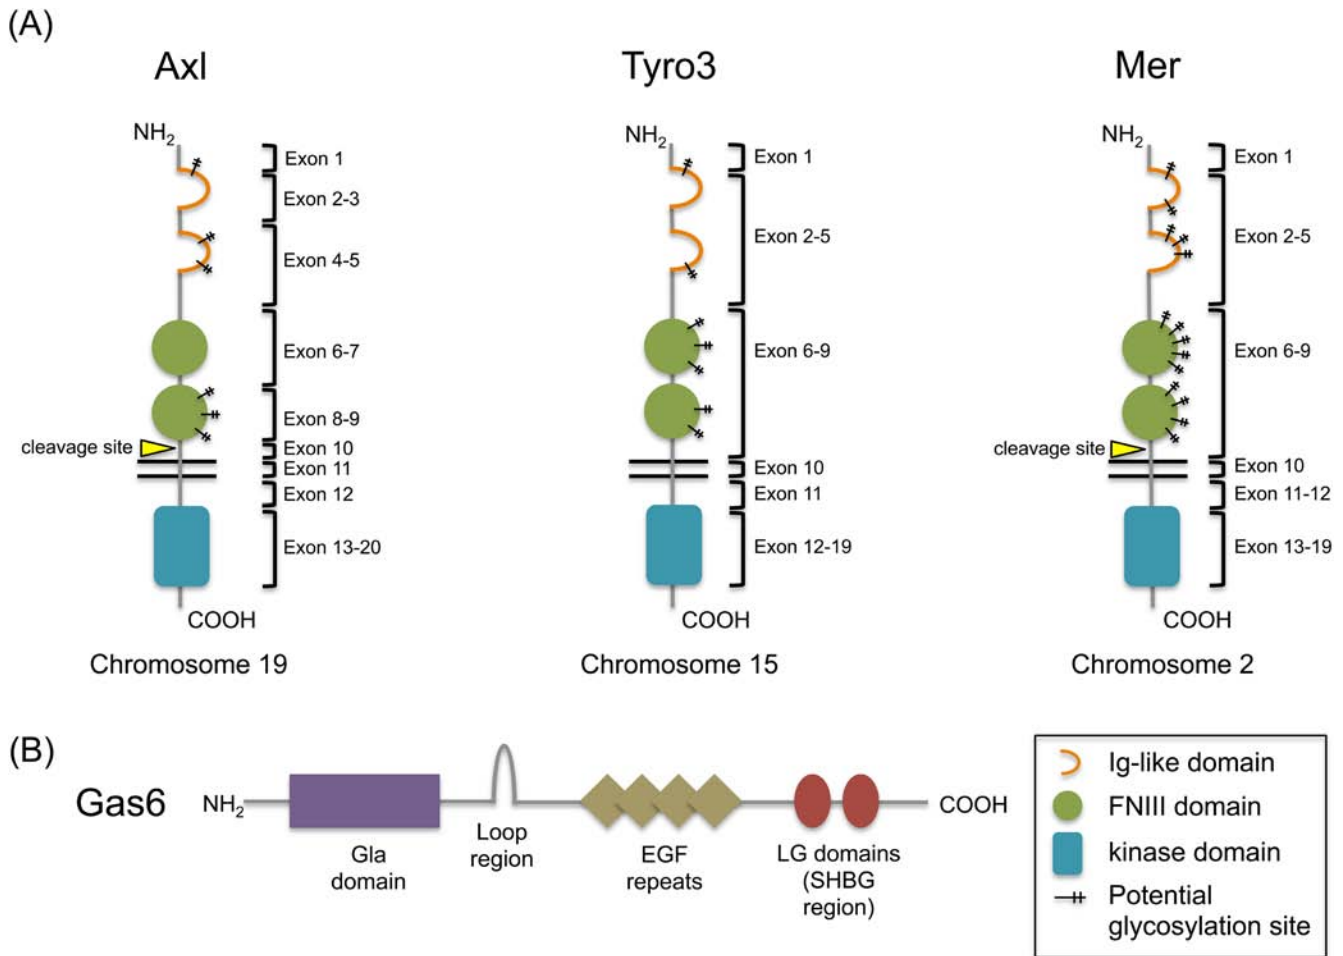

**Figure 1: Structures of the TAM receptors and their shared ligand, Gas6.** (A) The TAM family of receptors share common extracellular structures, composed of two Ig-like domains for ligand binding and two fibronectin III domains. Axl and Mer have both been shown to yield soluble extracellular fragments by protease cleavage just outside their transmembrane domains. To date, this has not been demonstrated for Tyro3. Potential glycosylation sites are represented on each receptor; Axl, amino acids 43, 157, 198, 339, 345, 401; Tyro3, amino acids 63, 191, 230, 240, 293, 366, 380; Mer, amino acids 114, 170, 207, 215, 234, 294, 316, 329, 336, 354, 389, 395, 442 (confirmed), 454. (B) Gas6 is a vitamin K-dependent protein that binds Axl with higher affinity compared to Tyro3 or Mer. The Gla domain allows for cell membrane contact and the LG domains bind the Ig-like domains of the receptors.

present at  $\sim 0.2\text{nM}$  in human plasma and is complexed with the soluble form of Axl, whereas protein S is present at 1,000 times higher concentration and 60–70% is bound to the complement regulator C4b-binding protein (C4BP) [14–16]. Initially, it was thought that protein S was the ligand for Tyro3 (Sky, BYK, Dtk, RSE, Tif), Gas6 was the ligand for Axl (Ufo, JTK11), and that additional protein S-related factors were potential candidates as the ligand for Mer (c-mer, RP38) [17]. By the time these were established as activating ligands, protein S had already been functionally characterized as a negative regulator of the coagulation pathway. However, the function of Gas6 was unknown. Later studies have shown that Gas6 is actually a common ligand for all three receptors, having the highest affinity for Axl, followed by intermediate and minor affinities for Tyro3 and

Mer, respectively [18]. The Gas6 gene was cloned in 1988 and characterized in 1993. Its name derives from its discovery – in a hunt for regulators of cell cycle arrest, Schneider et al. termed their findings “growth arrest-specific” factors [19]. The origin of Gas6 suggests a functional role for the TAM receptors in protection from cell death, and indeed later studies have proposed various roles for the receptor family in cell survival. Furthermore, the roles of Axl, Tyro3, and Mer extend to mediation of processes such as proliferation, migration, and adhesion in both normal and disease settings. The signaling overlap downstream of these receptors is evidence of their functional similarities, however much of the context- and receptor-specific signaling remains uncertain. Indeed, it is important to note that these roles are cell context-dependent, highlighting their complexity.

## Discovery of Axl

*Axl* was first isolated as an unidentified gene detected in two separate patients when Liu et al. began a search for transformants in chronic myelogenous leukemia in 1988 [20]. A few years later it was characterized and given the name “Axl,” derived from the Greek term “anexelekto,” or uncontrolled, based on the initial observations of its function [2]. Coincidentally in 1991, Janssen et al. cloned the same gene from a patient with a chronic myeloproliferative disorder, which they termed “UFO” for its unknown function [21]. The gene was shown to have low transforming potential that was not enhanced after multiple passages. When Axl was characterized in 1991, it was found that it was necessary but not sufficient for transformation [2, 20]. Rather, the transforming property of Axl was suggested to be due to a selection of its overexpression in cells, and to date, there have not been any activating mutations found [2, 22].

## The structure of Axl

The *Axl* gene is located on the long arm of chromosome 19, at position q13.2 [2]. The protein is approximately 140kDa in the fully glycosylated state, and is 120kDa when partially glycosylated (Figure 1). There are long and short isoforms of *Axl*, differing in the presence or absence of exon 10 by alternative splicing; the full-length isoform is the most abundant [2]. The alternative splicing of *Axl* has not been well studied, but it is proposed that inhibition of PKC coupled to downstream splicing effectors can induce exon skipping [23].

### Exon 1

The insertion of Axl into the plasma membrane is dependent upon the presence of a signal peptide located in exon 1 (Figure 1).

### Exons 2–5

Exons 2–5 make up the two Ig-like domains, which bind one laminin G-like (LG) domain in the sex hormone-binding globulin (SHBG) region of Gas6 (Figure 1). The structure of the Axl-Gas6 complex reveals that the first and second Ig-like domains of Axl form the major and minor contacts, respectively, with only the first laminin G-like domain in Gas6 (Figure 2) [24]. Binding in this manner prevents any direct Axl/Axl or Gas6/Gas6 contacts. The minor contact is conserved in Tyro3 and Mer, however the major contact responsible for high affinity binding is not, reflecting the hierarchy of Gas6 binding to each of the receptors [24].

## Exons 6–9

The FNIII domains in exons 6–9 provide the basis for the proposed role of Axl in adhesion (Figure 1). These domains are found within other adhesion molecules such as the neural cell adhesion molecule (NCAM), and fibronectin itself acts as molecular bridge for integrins and extracellular matrix components. Early on, Gas6 binding to Axl was shown to have a positive influence on cell-cell adhesion [25]. In fact, Axl is also known as “Ark” which stands for “adhesion-related kinase.” More recently, studies have demonstrated that the adhesion properties in which Axl is involved are both wide-ranging and context-dependent. In schwannoma, Axl cooperates with NFκB signaling to mediate cell-matrix adhesion, but in cutaneous squamous cell carcinoma, Axl mediates EMT by exerting a negative influence on cell-cell adhesion [26, 27]. Furthermore, in lung cancer cell lines Axl expression correlates with the adherence or suspension of cultures, but its expression seems to be a consequence of gaining adherent properties [28].

### Exon 11

It has been established that Axl can undergo an extracellular cleavage event in exon 11 near the transmembrane domain by an unconfirmed protease, producing a soluble fragment (Figure 1). This fragment contains both the FNIII and Ig-like domains, and is able to bind available Gas6 as a decoy receptor to effectively dampen Gas6 signaling [29, 30]. It has also been shown to bind membrane-associated Axl to inhibit signaling [31]. Soluble Axl (sAxl) has been detected in tumors, but it also may have a normal biological role in human serum where it binds to circulating Gas6 [16, 32]. Notably, application of sAxl to target Gas6/Axl signaling has been proposed as a therapeutic strategy in cancer [33, 34].

### Exons 13–20

As a Type I transmembrane receptor, Axl’s enzymatic kinase domain spans exons 13–20 within the intracellular C-terminus (Figure 1). The TAM receptors share a family-specific motif in their kinase domains, about 100 amino acids downstream from the ATP active site. In Axl and Mer the amino acid sequence is KWIAIES, but in Tyro3 the isoleucines are substituted with leucines [1].

## Axl in evolution and development

*Axl* homologs have been identified in *Pan troglodytes*, *Canis lupus*, *Bos taurus*, *Mus musculus*, *Rattus norvegicus*, and *Xenopus tropicalis*, while orthologs have been identified in over 70 organisms.

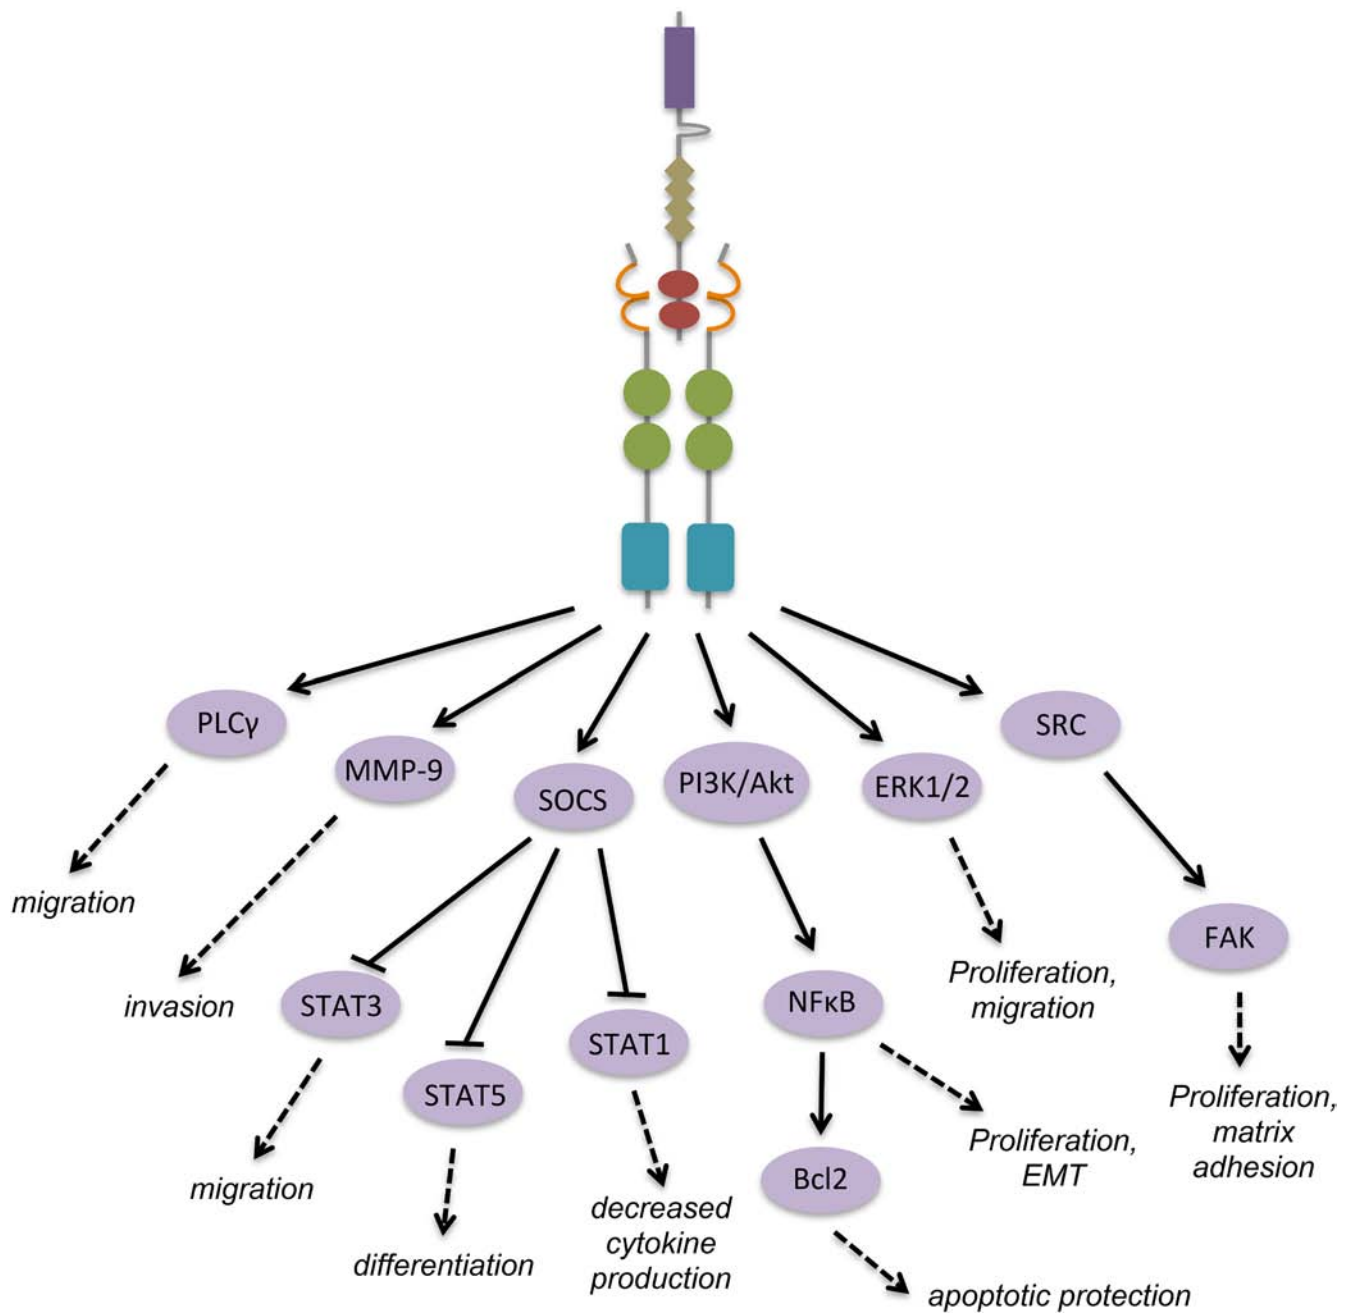

**Figure 2: Gas6 activation of Axl leads to homodimerization and activation of downstream signal cascades with functional consequences.** The above signaling diagram represents events downstream of Gas6 binding and Axl homodimerization across many cell types. Gas6 binding to Axl creates a major contact formed between the LG1 domain of Gas6 and the Ig-like 1 domain of Axl, and a minor contact between the LG1 domain of Gas6 and the Ig-like 2 domain of Axl. Other ligands not shown: protein S contains the same domains as Gas6, and binds Tyro3 and Mer through its SHGB region; tubby and Tulp1 contain “minimal phagocytic determinants” (MPDs) in their N-termini which are essential for receptor binding; tubby binds Mer and Tulp1 binds all three TAM receptors.

The TAM receptors seem to have arisen relatively recently in evolution, as they have no representation in *Drosophila melanogaster* or *Caenorhabditis elegans* [35]. The later appearance of the TAM receptors compared to other kinases such as those of the MAPK pathway supports their role in complex processes like hematopoiesis and the immune response [35].

Axl is expressed fairly late in embryogenesis compared to other RTKs. RNA *in situ* hybridization analysis has revealed the initial expression of Axl in substructures of developing tissues at day 12.5 after fertilization [36]. Whereas many RTKs are known for their essential role in embryonic development, the TAM receptor family seems to be dispensable. Triple knockout

of all TAM receptors in mice lead to viable offspring, whereas even a single point mutation in developmentally required RTKs can result in embryonic lethality [37, 38]. Although the triple negative offspring live, they do develop abnormalities such as autoimmune disorders due to hyperactivation of antigen-presenting cells as well as increased B and T cell populations [39].

### Activation of Axl and downstream consequences

As a receptor tyrosine kinase, Axl is activated upon paracrine or autocrine Gas6 binding and subsequent homodimerization, causing tyrosine autophosphorylation and phosphorylation of downstream targets (Figure 2). However, the mechanism of the activation step alone has been contested in various settings. It has been thought that Axl activation and autophosphorylation can occur independently of ligand binding, such as in the experimental setting of Axl overexpression. This leads to homophilic binding of extracellular domains on opposite cells and causes cell aggregation, independent of both

calcium and the Axl kinase domain [40]. In vascular smooth muscle cells (VSMCs) and lens epithelial cells ligand-independent activation of Axl occurs in response to hydrogen peroxide, where activation of Axl in the former involves reactive oxygen species (ROS) [41, 42]. In vascular endothelial cells, Axl phosphorylation in response to laminar shear stress may occur by an association with  $\beta 3$  integrin [31]. Additionally, phosphorylation of Axl can occur through VEGF-A induction of a SRC family kinase member (SFK) in endothelial cells [43].

Studies have found that heterodimerization between the TAM receptors may be a mode of activation (Figure 3). Due to the differential affinity of Gas6 for the receptors, it would make sense for Axl and Tyro3 to preferentially heterodimerize. Indeed, they co-immunoprecipitate in gonadotropin-releasing hormone (GnRH) neuronal cells [44]. On the surface of macrophages, Mer phosphorylation requires Axl and Tyro3 to efficiently mediate apoptotic cell clearance, and this may be due to their heterodimerization with Mer

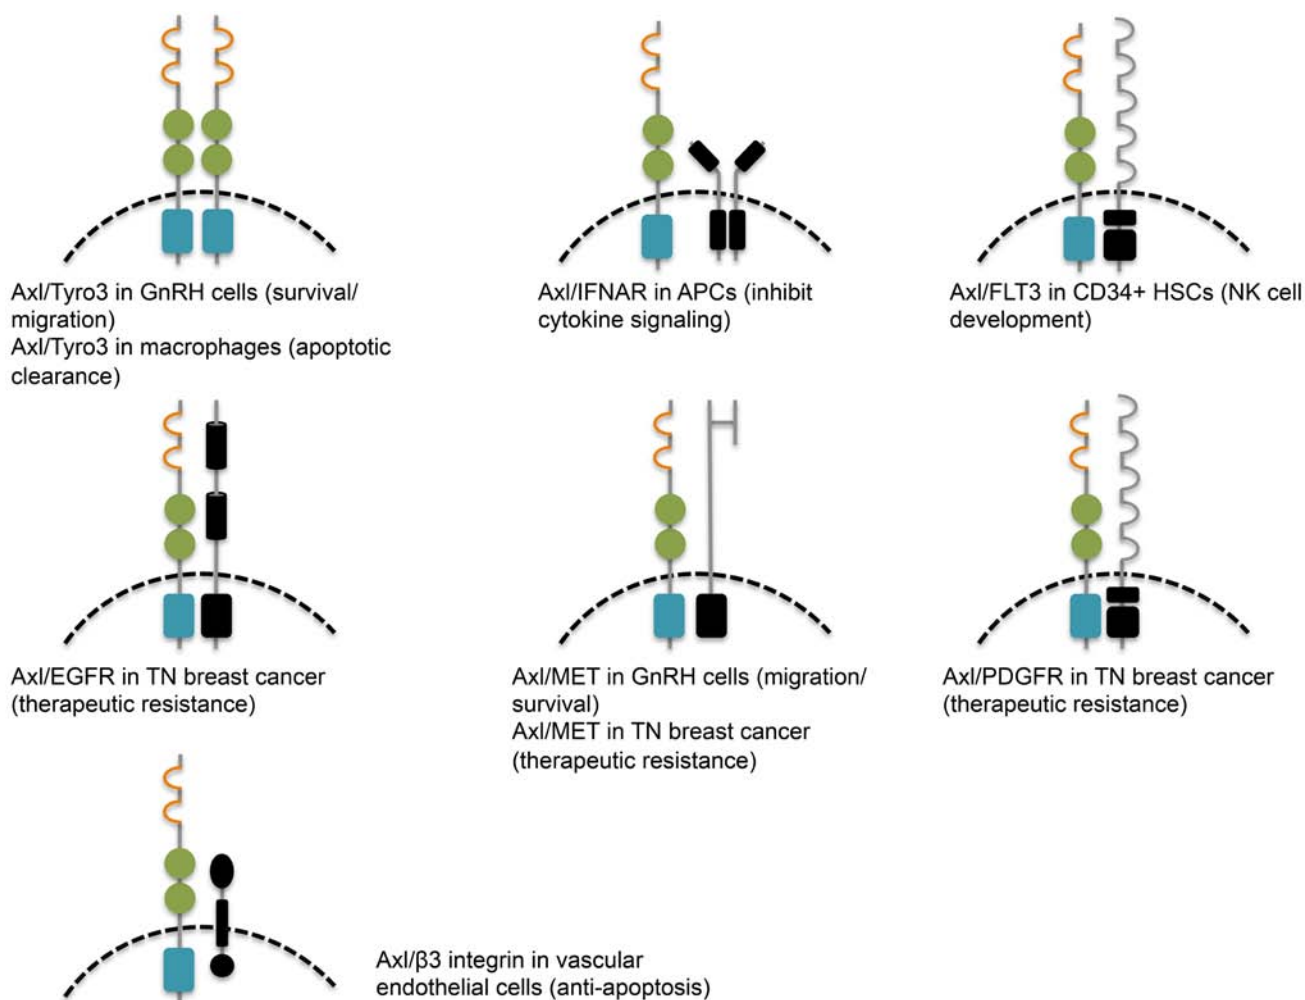

Figure 3: Activation of Axl by heterodimerization with plasma membrane proteins leads to cell-specific consequences.

after being stimulated with Gas6 [45]. In Rat2 fibroblast cells, Gas6 treatment induces Tyro3-dependent Axl phosphorylation, which further leads to the trans-phosphorylation of Tyro3 [46]. Heterodimerization may also occur with non-TAM receptor family members, such as the type I interferon receptor (IFNAR) and the FLT3 receptor [47, 48]. Notably, addition of FLT3 ligand leads to heterodimerization of Axl and FLT3, and phosphorylation of FLT3 is reduced after addition of the extracellular Fc portion of Axl [48]. EGFR associates with and transactivates Axl independently of Gas6 to amplify EGFR signaling in triple negative (TN) breast cancer cells [49]. Weak interaction has been proposed for Axl and MET in GnRH neuronal cells, where stimulation with their ligands Gas6 and HGF, respectively, leads to receptor-specific phosphorylation without trans-phosphorylation [50].

Aside from physical association, Axl may functionally cross-talk with other signaling pathways, leading to context-specific outcomes. In natural killer cell differentiation, Gas6/Axl signaling is involved in crosstalk with c-Kit signaling, and prevention of Gas6 binding to Axl inhibits c-Kit phosphorylation [51]. Importantly, Axl signaling synergizes with other RTKs after they are therapeutically targeted, leading to diversification of signaling and therapeutic resistance [49].

In studies to date, the signaling downstream of Axl resembles that of most RTKs. Which specific pathways are activated and at what time is context-dependent, determined by the extracellular environment, cell type, and tissue type. The initial characterization of Axl in myeloid leukemia described two PI3K consensus-binding sites in the kinase domain, similar to other RTKs [2]. Since then Axl signaling through PI3K has been firmly established in many circumstances through which it regulates cell migration, growth, angiogenesis, and apoptosis, among other processes [43, 52–55]. In 1997, Braunger et al. identified two subunits of PI3K, p85 $\alpha$  and p85 $\beta$ , as well as PLC $\gamma$ , GRB2, SRC, and LCK, as substrates of Axl (Table 1) [56]. These substrates all bind tyrosine 821; additionally, the p85 proteins can bind Y779 with lower affinity, and PLC $\gamma$  can bind Y866 (Table 1).

A yeast two-hybrid screen using the cytoplasmic domain of Axl as bait against a heart cDNA library uncovered the p55 $\gamma$  subunit of PI3K, SOCS-1, Nck2, RanBPM, and C1-TEN as Axl binding proteins [57]. Importantly, C1-TEN was discovered during this screen as a novel C1 domain-containing protein with homology to tensin and PTEN, and has since been implicated in cancer. By binding all of these adaptor proteins, Axl has extremely diverse signaling capabilities through the PI3K, Akt, mTOR, NF $\kappa$ B, and MAPK pathways. It becomes paramount, therefore, to determine the exact contribution of Axl in each tissue and disease context, and how to therapeutically manipulate it.

## Regulation of Axl

The direct regulation of Axl at the protein, translational, and transcriptional levels remains a large gap in the field. Signaling through RTKs may be dampened or shut off by a mono-ubiquitination signal, leading to endosome-mediated internalization and lysosomal degradation. This holds true for Axl signaling, whose ubiquitin ligase is c-Cbl. The Cbl family also targets EGFR, PDGFR, CSF-1R, and HGFR [58]. Binding of Gas6 to Axl promotes its downregulation through this mechanism, also common amongst other RTKs and their respective ligands [42, 59].

A similar mechanism of Axl downregulation may be imposed by the von Hippel-Lindau (VHL) protein, a ubiquitin ligase known to target hypoxia-inducible factor 1-alpha (HIF1 $\alpha$ ). Reconstitution of cells with VHL decreases Axl protein levels, but does not affect Axl mRNA levels, indicating regulation at the protein level [60]. Exclusive regulation of Axl at the protein level also occurs during chemically-induced hypoxia in prostate cancer cells. Although the exact mechanism is unknown, cobalt chloride (CoCl<sub>2</sub>) treatment of Gas6-stimulated cells prevents Gas6-mediated downregulation of Axl protein [61].

The use of phosphatases by the cell is a common method of reversible downregulation of RTK activity. However, there are no confirmed Axl-targeting phosphatases to date. As mentioned previously C1-TEN

**Table 1: Axl tyrosine phosphorylation and respective binding partners.**

| Tyrosine | Potential Autophosphorylation? | Binding Partners                                            | Reference |
|----------|--------------------------------|-------------------------------------------------------------|-----------|
| 702      | No                             | Grb2/Ack1                                                   | [281]     |
| 703      | No                             | Grb2/Ack1                                                   | [281]     |
| 779      | Yes                            | PI3K p85 $\alpha$ / $\beta$                                 | [56]      |
| 821      | Yes/No                         | PLC $\gamma$ , PI3K p85 $\alpha$ / $\beta$ , GRB2, SRC, LCK | [56, 282] |
| 866      | Yes                            | PLC $\gamma$                                                | [56]      |

is an *Axl* binding protein with phosphatase activity, but it has not been shown to directly dephosphorylate *Axl*.

Post-transcriptional regulation has been shown to occur through microRNA (miRNA) binding of the 3' UTR of *Axl*. So far, two *Axl*-targeting miRNAs have been identified, miR-34a and miR199a/b, through a bioinformatics screen using non-small cell lung cancer, breast cancer, and colorectal cancer cell lines [62]. Importantly, transfection of these miRNAs inhibits cell migration and invasion *in vitro*, and metastasis *in vivo*. Regulation by miRNAs not only has clinical significance, but it unveils another layer of diversity within *Axl* signaling, as expression of miRNAs is often cell/tissue specific.

At the transcriptional level, there are multiple ways to regulate *Axl* (Figure 4). Several transcription factors have been shown to upregulate *Axl* transcription. HIF1 $\alpha$  regulation of *Axl* was observed in a gene expression microarray using RNA from hypoxia-exposed pulmonary artery epithelial cells [63]. Although HIF1 $\alpha$  binding to the

*Axl* promoter has not been functionally validated, HIF1 $\alpha$  binding to *Axl* was found to be enriched using CHIP-seq in human umbilical vein endothelial cells (HUVEC) under hypoxia [64]. MZF1 has been implicated in cancer development, and binding to the *Axl* promoter enhances *Axl* mRNA and protein expression, inducing invasion and *in vivo* metastasis in colorectal and cervical cancer [65]. AP1 is also a transcription factor that can regulate *Axl*, and is required for the overexpression of *Axl* in TKI-resistant CML cells [66, 67]. *Axl* overexpression can also occur through four TEAD-binding domains in its promoter, which requires the coactivator YAP [68]. The adenovirus type 5 early region 1A (E1A) gene exerts tumor suppressive activity by downregulating *Axl* transcription to induce apoptosis in *Axl*-expressing cells [69]. The SP zinc-finger transcription factors Sp1 and Sp3 have been shown to bind GC-rich regions in the *Axl* promoter to upregulate its transcription, while methylation of CpG sites in Sp binding regions restricts *Axl* gene expression [70]. *Axl* also has 17 CCWGG sites in its promoter, and

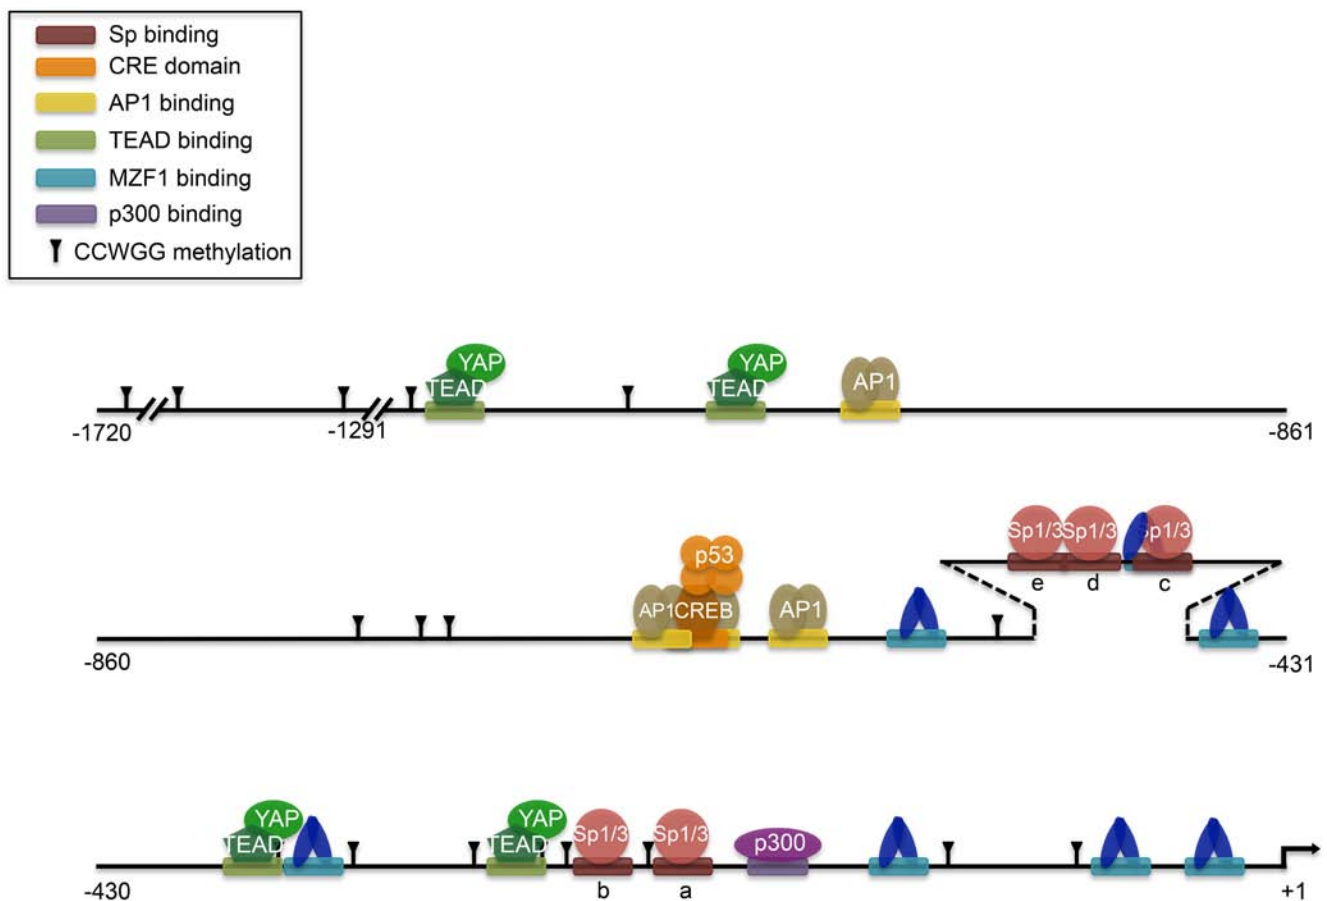

**Figure 4: Transcription factor binding to the *Axl* promoter.** Adapted compilation of figures from multiple sources (Mudduluru, 2010; Mudduluru, 2011; Xu, 2011; Mudduluru, 2008; Hong, 2008; Vaughan, 2012). Putative HIF1 $\alpha$  binding to HRE sequences is not shown. p53 interaction with CREB complex induces histone acetylation around CRE sites. YAP is a transcriptional cofactor for TEAD. Methylation of CCWGG sites are marked. CpG methylation is not shown, but occurs in 19 CpG sites within nucleotides -669 to -97. CpG methylation also occurs in Sp a, b, and c sites which prevents Sp factors from binding.

methylation at these sites prevents *Axl* from responding to chemotherapy drugs [71]. Hypomethylation of the *Axl* promoter leading to upregulation is found in Kaposi sarcoma cell lines [54]. The methylation status of *Axl* not only has implications for disease, but it also affects heritability, eliciting the phenomenon of genomic imprinting. A differentially methylated region (DMR) in the paternal allele of *Axl* causes silencing and preferential expression of the maternal allele [72]. Twin studies have found that DNA methylation levels of *Axl* are significantly heritable [73].

### Tissue and cell type-specific roles for *Axl*

Unlike its other family members, *Axl* is nearly ubiquitously expressed among cell types. The biologic effects of signaling through *Axl*, as well as consequences of *Axl* overactivation or downregulation, are cell/tissue type specific in health and disease (Table 2).

### Hematopoiesis

The initial discovery of *Axl* in a screen for CML transformants alludes to its involvement in the blood-forming lineages (Figure 5). Since then, an important role for *Axl* has been established in maintaining normal homeostasis of hematopoiesis, and it is most prominent in the CD34<sup>+</sup> early myeloid lineage of hematopoietic cells [74].

Most likely through *Axl* signaling, *Gas6* production by bone marrow stromal cells supports hematopoiesis in culture [75]. Support of hematopoiesis was defined in this study as the ability to produce myeloid colony-forming cells for months [76]. Since the soluble form of *Gas6* is not sufficient for hematopoietic support, the mechanism is proposed to be through *Gas6*-mediated chemotaxis of *Axl*-expressing progenitor cells [75]. Both *Axl* and *Mer* cooperate to regulate the differentiation of cells in the erythroid lineage, where *Axl*<sup>-/-</sup> *Mer*<sup>-/-</sup> mice are unable to produce differentiated erythroid progenitors [77]. These mice also display impaired megakaryocytopoiesis indicated by prolonged time to clot after transection of the tail tip compared to normal or other combinations of double knockout mice [78].

*Axl* represents a prognostic biomarker in diseases of the myeloid lineage such as AML and CML, and may be a therapeutic target. *Axl* is upregulated in AML patients and correlates with a decrease in both progression-free and overall survival [79]. In FLT3/ITD-driven AML, *Axl* positively regulates constitutive FLT3, leading to cell growth, proliferation, and inhibition of myeloid differentiation [33]. Another study found that *Axl* can be therapeutically targeted in AML independent of the FLT3 mutational status [80]. Furthermore, this therapeutic inhibition of *Axl* also inhibits the Akt and MAPK pathways, implying a mechanism through which *Axl* upregulation promotes growth and proliferation in

AML cells [80]. A mode of chemoresistance in AML cells has been proposed to be through their instruction of bone marrow stromal cells to upregulate *Gas6* through IL-10 and M-CSF [80]. In CML, resistance to the TKI imatinib is also correlated with high levels of *Axl* [66]. The reoccurrence of the participation of *Axl* in therapeutic resistance may also indicate its role as more of a “passenger” than a “driver” of disease. In fact, a study to determine if *Axl* participates in the onset or the progression of CML became a study of noninsulin-dependent diabetes mellitus (NIDDM), when ectopic overexpression of *Axl* in the myeloid lineage of transgenic mice induced a NIDDM phenotype rather than causing hematopoietic malignancies [81]. Although it is more frequently expressed in myeloid cells, inhibition of *Axl* in B cell-derived microvesicles has been shown to increase apoptosis in CLL B cells [82]. However because of the cooperative nature of *Axl*, these apoptotic effects may be mediated by combination signaling with the other upregulated kinases in CLL such as PI3K, c-Src, and PLC $\gamma$ 2 [82]. Additionally, B cell-derived microvesicles circulating in CLL plasma can deliver constitutively phosphorylated *Axl* to BMSCs to enhance the tumor microenvironment and recruit additional tyrosine kinases, and not surprisingly, this phosphorylation status correlates with clinical prognosis [82, 83]. *Axl* expression also has implications in other cells of the lymphoid lineage, such as natural killer (NK) cells. In combination with Tyro3 and *Mer*, *Axl* signaling is essential for the differentiation of NK cells, where it regulates the IL-15, c-Kit, and FLT3 pathways [48, 51, 84]. Interestingly, NK cells can be instructed to reject metastatic tumors through the inhibition of Cbl-b, an E3 ubiquitin ligase for all three TAM receptors [85].

### Myeloid lineage

Macrophages are differentiated cells of the myeloid lineage, and of the TAM receptors, mutated *Mer* seems to have the most pronounced effect on macrophage function [86]. However, given that *Axl* is preferentially expressed in macrophages, monocytes, and dendritic cells compared to cells of the lymphoid lineage, its role in the innate immune response cannot be overlooked. Macrophages are an important component of the immune system, in that they ingest foreign material and can act as antigen-presenting cells. Triple knockouts of the TAM receptors in mice remain embryonically viable, but develop autoimmune diseases around 4 weeks postnatal [86]. Specifically, the inability of macrophages to phagocytose and clear apoptotic cells reflects the normal role of the TAM receptors in this process, although it is more attributed to the *Mer* receptor [86]. The Gla domains of both *Gas6* and protein S are able to bind phosphatidylserine (PS) and acidic phospholipids



**Table 2: Axl signaling and functional consequences in normal and disease contexts.**

| Normal Cell/Tissue Type      | Signaling                                                                         | Consequence                                                                                 | Reference                                       |
|------------------------------|-----------------------------------------------------------------------------------|---------------------------------------------------------------------------------------------|-------------------------------------------------|
| HSCs                         | –                                                                                 | Hematopoietic support, inhibition of proliferation                                          | [75]                                            |
| Erythrocytes                 | –                                                                                 | Differentiation                                                                             | [77]                                            |
| Platelets                    | $\beta$ 3 integrin, PI3K/Akt                                                      | Aggregation                                                                                 | [166–168]                                       |
| Megakaryocytes               |                                                                                   | Differentiation                                                                             | [78]                                            |
| NK cells                     | STAT5, c-Kit, FLT3                                                                | Differentiation                                                                             | [48, 51, 84]                                    |
| Macrophages                  | –                                                                                 | Apoptotic cell clearance, regulation of immune response                                     | [86, 88, 91]                                    |
| Dendritic cells              | STAT1                                                                             | Regulation of immune response                                                               | [47]                                            |
| Chondrocytes                 | ERK1/2                                                                            | Proliferation/differentiation                                                               | [95]                                            |
| Lung (general)               | MCP-1, IL-8, IFN- $\beta$ , IL-13                                                 | Regulation of immune response                                                               | [6, 123, 124]                                   |
| Vascular smooth muscle cells | PI3K/Akt/PKB/S6K, SHP2, PLC $\gamma$ , ERK1/2                                     | Apoptotic/injury protection, migration, survival                                            | [157–159, 161–163, 175–177, 179, 185]           |
| Vascular endothelial cells   | c-SRC, PI3K/Akt/NF $\kappa$ B/Bcl2, VEGF, SHP2, $\beta$ 3 integrin, IFN- $\gamma$ | Proliferation, apoptotic protection of quiescent cells, angiogenesis, inflammatory response | [31, 43, 53, 107, 164, 165, 181, 182, 187, 188] |
| Cardiac fibroblasts          | ERK                                                                               | Proliferation                                                                               | [174]                                           |
| Renal glomerular cells       | PDGF                                                                              | Proliferation                                                                               | [191]                                           |
| Renal tubular cells          | –                                                                                 | Proliferation                                                                               | [193]                                           |
| Adipocytes                   | –                                                                                 | Maintenance of stemness                                                                     | [201–203]                                       |
| Schwann cells                | ERK2                                                                              | Proliferation                                                                               | [221]                                           |
| GnRH neurons                 | MEF-2, PI3K/Akt, ERK1/2                                                           | Migration, apoptotic protection                                                             | [44, 226–228]                                   |
| Microglia                    | p38 MAPK, NF $\kappa$ B                                                           | Apoptotic clearance, inhibition of cytokine signaling                                       | [224, 231–233]                                  |
| Cerebral endothelial cells   | Akt                                                                               | Apoptotic protection                                                                        | [234]                                           |
| Oligodendrocytes             | PI3K/Akt                                                                          | Apoptotic protection                                                                        | [235, 236]                                      |
| Lens epithelial cells        | PI3K/Akt                                                                          | Proliferation, survival, development                                                        | [245, 246]                                      |
| Retinal cells                | –                                                                                 | Clearance of apoptotic cells                                                                | [90, 247, 248]                                  |
| Hepatic oval cells           | –                                                                                 | Apoptotic protection                                                                        | [266]                                           |
| Hepatic stellate cells       | PI3K/Akt, NF $\kappa$ B                                                           | Apoptotic protection                                                                        | [269]                                           |
| Liver (general)              | SOCS1                                                                             | Regulation of immune response                                                               | [5, 271]                                        |

*(Continued)*

| Disease Cell/Tissue Type            | Downstream Signaling                           | Consequence                                                                                        | Reference                                      |
|-------------------------------------|------------------------------------------------|----------------------------------------------------------------------------------------------------|------------------------------------------------|
| AML                                 | FLT3, Akt, MAPK, IL-10, M-CSF                  | Proliferation, maintenance of stemness, therapeutic resistance                                     | [33, 79, 80]                                   |
| CML                                 | –                                              | Therapeutic resistance                                                                             | [66]                                           |
| B cell-derived microvesicles in CLL | PI3K, SRC, PLC $\gamma$ 2, Akt                 | Apoptotic protection                                                                               | [82, 83]                                       |
| Osteosarcoma                        | Akt, MMP-9                                     | Apoptotic protection, invasion/migration, proliferation                                            | [96–99]                                        |
| Prostate cancer                     | PI3K/Akt/NF $\kappa$ B, MAPK                   | Proliferation, invasion/migration, dormancy, therapeutic resistance                                | [100–104]                                      |
| Breast cancer                       | NF $\kappa$ B, c-MET, PDGFR, EGFR, MMP-9, SOCS | EMT/migration, proliferation, apoptotic protection, therapeutic resistance                         | [49, 69, 108, 109, 112–117, 120–122]           |
| Mesothelioma                        | PI3K/Akt/mTOR, MAPK                            | Migration/invasion, proliferation                                                                  | [126, 127]                                     |
| NSCLC                               | ERK, PI3K/Akt/Rac1, NF $\kappa$ B, EGFR        | Regulation of immune response, proliferation, EMT/migration, therapeutic resistance                | [62, 129–132, 136–138, 140–142, 146, 147, 149] |
| Renal cell carcinoma                | –                                              | Proliferation, angiogenesis                                                                        | [60, 196–200]                                  |
| Melanoma                            | STAT3, RAF/MEK, NF $\kappa$ B                  | Migration/invasion, apoptotic protection, therapeutic resistance                                   | [210, 212–215, 217]                            |
| Squamous cell carcinoma             | Akt/Bcl2, Wnt/TGF $\beta$ , NF $\kappa$ B      | Migration/invasion, apoptotic protection, therapeutic resistance, disruption of cell-cell adhesion | [27, 93, 220]                                  |
| Schwannoma                          | FAK/Src/NF $\kappa$ B                          | Proliferation, cell-matrix adhesion                                                                | [26]                                           |
| Astrocytoma                         | PI3K/Akt, ERK1/2                               | Therapeutic resistance, apoptotic protection                                                       | [230]                                          |
| Glioma                              | –                                              | Migration/invasion, survival, maintenance of stemness, angiogenesis                                | [158, 237–241]                                 |
| Ocular melanoma                     | Cyr61                                          | Apoptotic protection, proliferation                                                                | [251]                                          |
| Retinoblastoma                      | –                                              | Proliferation                                                                                      | [252]                                          |
| Thyroid carcinoma cells             | –                                              | Apoptotic protection, proliferation, invasion, angiogenesis                                        | [253–256]                                      |
| Colon carcinoma                     | STAT3, SFK, PI3K/Akt                           | Proliferation, invasion, therapeutic resistance                                                    | [65, 258–263]                                  |
| Hepatocellular carcinoma            | Cyr61, ERK, PI3K/Akt                           | Migration                                                                                          | [274, 275, 277]                                |

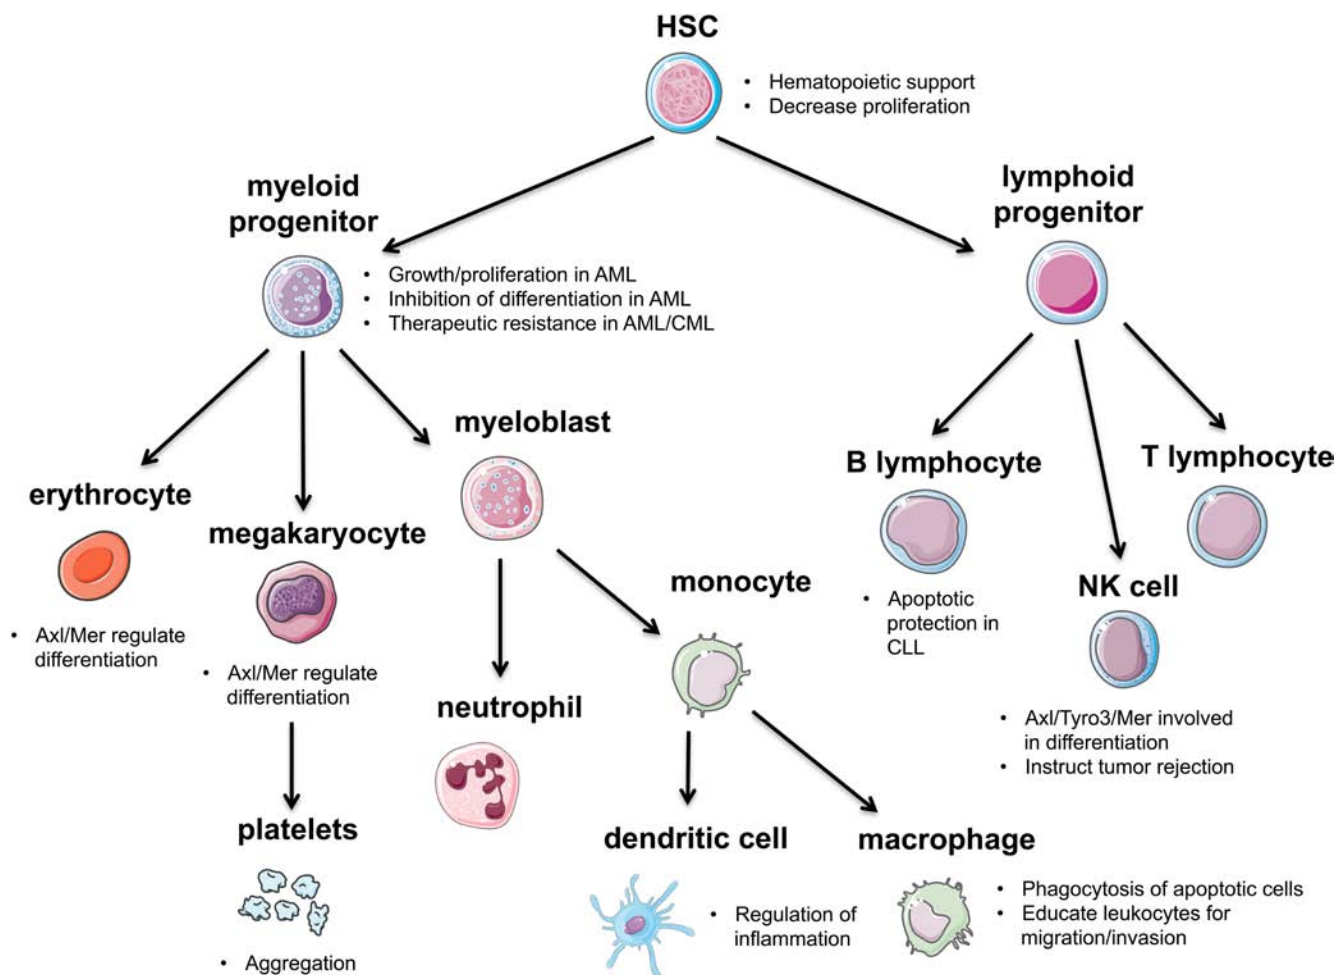

**Figure 5: Representation of Axl in the blood-forming lineages.** Axl contributes to the maintenance of HSCs and helps regulate differentiation of various HSC lineages. Axl plays a major role in the immune response by regulating inflammation and helping to clear apoptotic cells.

which become expressed on the outer leaflet of the plasma membrane during apoptosis [87]. It is proposed that the ligands are still available for TAM receptor binding, which under normal circumstances leads to mobilization of apoptotic cells to macrophages which have upregulated TAM receptors as a response to the initial immune stimulus [86]. This mechanism becomes hijacked in infertile men in which increased levels of estradiol stimulate Leydig cells to produce more Gas6 and elevate levels of PS on their surfaces, independent of the apoptotic status of the cells [88]. In this setting Axl acts as the primary receptor for bridging Gas6 with testicular macrophages. Additional ligands for the TAM receptors, tubby and Tulp1, have been more recently discovered for their role as macrophage phagocytosis ligands, acting in a similar manner to Gas6 and protein S in their ability to bridge macrophages with apoptotic cells [89, 90]. Tubby is specific for Mer, but Tulp1 can interact with any of the TAM receptors. Additionally, Axl has a normal role in regulating innate immunity

by limiting cytokine-mediated inflammation. This is in part due to the activity of the JAK/STAT pathway, whereby TLR-driven cytokine activation leads to STAT/IFNAR-dependent transcription of Axl in dendritic cells [47]. Upregulation of Axl by Type I interferon (IFN) is required for IFN downregulation of TNF- $\alpha$  production, hence the anti-inflammatory role of Axl in the innate immune response [47]. This extends positively as a protective role in colitis and colorectal adenomas, the risks of which are both dramatically increased with chronic inflammation. Axl and Mer cooperation in lamina propria macrophages helps to regulate the inflammatory immune response, as *Axl<sup>-/-</sup>Mer<sup>-/-</sup>* mice have a significant increase in proinflammatory mediators [91].

Macrophages can also interact with tumor cells to promote malignancy. Tumor-associated macrophages express and secrete high levels of Gas6 in the tumor stroma, possibly to help educate infiltrating leukocytes to increase their production of Gas6, and this cooperative Gas6 increase in the bone marrow niche promotes tumor

growth and metastasis of cells expressing high Axl [92]. In oral squamous cell carcinoma (OSCC) cells, expression of Axl is increased during coculture with tumor-associated macrophages having abundant levels of Gas6 [93]. This stimulates Axl signaling through NFκB to promote malignancy. Taken together, this suggests that tumor cells can exploit Axl by increasing the availability of its ligand through macrophages in order to create a supportive environment for tumor growth and survival. Again, this is consistent with a more secondary role for Axl, where it becomes a factor in cancer progression and maintenance, rather than initiation.

## Bone

As alluded to previously, Axl/Gas6 signaling is an important part of the interaction between bone marrow derived hematopoietic stem cells and bone marrow stromal cells. Because of the heterogeneous nature of the bone marrow, the autocrine/paracrine secretion of Gas6 becomes an important aspect of Axl signaling and communication between different cell types. This is a normal component of the bone marrow microenvironment, but is also exploited to support cancer development and maintenance. *Axl* expression was observed to be greater than 800-fold higher in bone marrow mesenchymal stromal cells (BMSCs) compared to bone marrow-derived hematopoietic stem cells, and *Gas6* expression is similarly increased in BMSCs around 380-fold [94]. The maturation of chondrocytes is another alternative step in the differentiation of mesenchymal stem cells in the bone marrow, and this process correlates with the expression of Axl and Mer [94, 95]. A study in bovine tissue found differential regulation of chondrocyte differentiation by Gas6, and that this was due to opposite expression of Axl and Mer at different times [95]. Specifically, Gas6/Axl signaling in the earlier phase was suppressive of differentiation, whereas in the later phase Gas6/Mer signaling was supportive of differentiation.

Although a role for Axl in osteocyte differentiation from mesenchymal stem cells has not been proposed, its expression in osteoblasts is significant in cancer. Not unlike other cancers, osteosarcoma cells show increased levels of activated Axl which are correlated with clinical prognosis [96]. In this setting, Axl protects tumor cells from apoptosis and promotes their invasion and migration, potentially contributing to lung metastasis. Phosphorylated Axl may mediate these effects through Akt signaling and upregulation of matrix metalloproteinase 9 (MMP-9). In the same manner, another study showed that knockdown of *Axl* increased apoptosis and decreased proliferation, also mediated by downregulation of the Akt pathway [97]. A recent study unraveled additional RTKs involved in the metastatic potential of osteosarcoma, and after lengthy metastatic-dependent validations *Axl* came out as a top

hit in a metastatic osteosarcoma cell line [98]. *Axl* also emerged from another screen for differentially expressed genes in high versus low metastatic osteosarcoma sublines [99].

In a similar manner to the exploitation of macrophages by cancer cells to create a supportive tumor niche, osteoblasts can support disseminated prostate tumor cells (DTCs) that metastasize to the bone marrow. There, osteoblasts physically bind DTCs through annexin2, and this causes upregulation of *Axl* transcription and display on the DTC surface [100]. This allows for sufficient, localized binding of Gas6, which is secreted by the osteoblasts. However, unlike the pro-proliferative properties of Axl in other cancers, Gas6/Axl signaling in this cellular context leads to tumor cell dormancy and evasion of therapy.

## Prostate

The contribution of Axl to processes in the normal prostate has not been studied, but in prostate cancer, Axl has clinically significant implications. The first account of Axl in prostate cancer was its elevated expression in a metastatic prostate carcinoma cell line, DU145, compared to normal prostate cells and another prostate carcinoma cell line, PC3 [101]. This has since been confirmed by other studies. On the other hand, the mRNA levels of *Gas6* are unchanged between normal and prostate cancer tissue [102]. Notably, Axl activation also correlates with the androgen-insensitive cell lines PC3, DU145, and CL1 [102]. As well as possessing a putative role in metastasis, Axl has been shown to increase proliferation of prostate cancer cells. Both PC3 and DU145 cells respond to Gas6 by increasing their proliferation, but this effect is more predominant in DU145 cells in correlation with elevated levels of Axl [103]. This mitogenic signaling is through a combination of the PI3K/Akt and MAPK pathways, and is therefore complicated by the common occurrence of PTEN deletions in prostate carcinomas and the PC3 cell line [103]. Further investigation into the mitogenic signaling downstream effector of Axl/Akt activation in prostate cancer uncovers NFκB, which also induces the secretion of IL-6 to activate IL-6/STAT3 signaling [102]. Silencing *Axl* in PC3 cells inhibits proliferation, invasion, and migration; implantation of *Axl*-silenced PC3 cells into mice displays reduced cell growth compared to mice implanted with untransfected PC3 cells [102]. Unlike in other cancer types, Gas6/Axl signaling is unable to protect prostate cancer cell lines from serum starvation-induced apoptosis [103].

Prostate cancer preferentially metastasizes to the bone, leading to devastating morbidity and mortality. In mouse models of human prostate cancer, Axl expression is increased in DTCs compared to the primary tumor, where Tyro3 expression prevails [104]. Proliferation appears to correlate with increased Tyro3 levels, whereas decreased Ki67 staining correlates with increased Axl

levels, implying dormancy of DTCs [104]. It is thought that the mechanisms governing HSC quiescence and hematopoiesis are transferrable to DTC dormancy, and this supports the involvement of Gas6/Axl signaling [75, 104]. As mentioned earlier, Gas6 is secreted by osteoblasts in the bone marrow, which increases *Axl* expression in DTCs upon binding to annexin A2 [100]. The tendency of prostate metastases to be osteoblastic rather than osteolytic, further builds a more suitable cancer niche to facilitate DTC dormancy through a Gas6/Axl axis. The stability of Gas6/Axl signaling is thought to be mediated by hypoxia, where the hypoxia-mimicking agent, CoCl<sub>2</sub>, prevents the c-Cbl-mediated downregulation of Axl [61]. This downregulation of Axl is exclusively at the protein level, as *Axl* mRNA levels are unchanged. It is undetermined whether the chemically-induced stabilization of HIF1 $\alpha$  is an accurate reproduction of the hypoxic environment in terms of Axl stabilization. This will be an important feature to determine, as the bone marrow exhibits reduced oxygen levels. Dormancy through Gas6/Axl signaling may be involved in mediating protection against chemotherapy, as treatment of PC3 cells *in vitro* with Gas6 decreased chemotherapy-mediated apoptosis [100]. Axl has been implicated as a prognostic and imaging marker in some cancers, including prostate cancer. A protein array detecting antigens from serum of immunized mice identified Axl as a strong candidate [105, 106].

The dichotomous effects of Axl in proliferation in prostate cancer models suggests that its role most likely depends on the exact cellular context. Studies that observe pro-proliferative effects by Axl seem to focus on the primary tumor, whereas cell dormancy mediated by Axl occurs in the bone marrow. It could also be that Axl is merely *associated* with DTC dormancy in the bone marrow, where it acts as a pro-survival factor to keep cells from undergoing apoptosis until they receive further signals to reawaken. This notion has been implicated in the quiescent endothelial cells of the vessel wall [107]. Additionally, proliferation assays *in vitro* of PC3 cells with Gas6 yield opposite results in different studies [103, 104]. This may simply be due to discrepancies of the assays, or more significantly, to the sensitivity of Axl to the surrounding environment. Regardless, it will be important to determine the regulation of Axl and Gas6 in these contexts in order to fully understand the contribution of Axl signaling to the progression of prostate cancer. Axl may represent a therapeutic target in preventing metastasis.

## Breast

Axl is expressed in the normal mammary gland, but many studies have detected its overexpression in aggressive tumors, cell models of breast cancer, and metastatic tumors, and thus, it may independently predict

reduced patient survival [108–112]. This has led to the emergence of multiple Axl inhibitors for research and therapeutic use across many cancers. It is worth noting that Axl is expressed exclusively in breast epithelial cells, and not in the surrounding fibroblasts or adipose tissue [109]. Although Axl is upregulated in TN breast cancer cell lines, this correlation does not carry over to patient samples [113]. Instead, membranous expression of Axl is associated with lymphovascular invasion, implying a role in migration and metastasis [113]. Interestingly, increased expression of Axl in metastasized breast cancer has been shown to be an effector of metastasis, where it maintains invasiveness rather than functioning as a driver [108]. This is attributed to the induction of *Axl* by EMT-inducing transcription factors, and a follow-up study implicated vimentin as an intermediary between the two [108, 114]. Microarray analysis in breast epithelial cells showed decreased expression of *Axl* after knockdown of *vimentin*, and that *Axl* and *vimentin* correlate positively in patient samples [114]. Functional studies further define Axl as an important regulator of migration, and some even place Axl upstream as an inducer of EMT [114, 115]. In inflammatory breast cancer cells, TIG1 stabilizes Axl by inhibiting its proteasome-dependent degradation; this reduces proliferation, migration, and invasion of the cells through NF $\kappa$ B and MMP-9 activation [116]. Regulation of Axl to promote invasion and metastasis can also occur via glycosylation, as evidenced by inhibition of ST6GalNAcII resulting in decreased Axl expression and invasive ability in malignant tumor cells [112].

Axl is necessary for the tumorigenesis of breast cancer cells *in vivo*, and this extends to maintaining tumor growth despite apoptotic signals induced by nutrient deprivation [69, 117]. Overexpression of Axl protects breast cancer cells from serum starvation-induced apoptosis, as it does in osteosarcoma cells, mentioned previously [69, 109, 117]. Negative regulation of *Axl* by the early region 1A (E1A) gene mediates the pro-apoptotic, tumor suppressive properties of E1A in breast cancer, whereas estrogen induction of *Axl* protects breast cancer cells from apoptosis [69, 109]. Axl and the estrogen receptor (ER) have high expression correlation in a subset of breast cancer, and treatment of ER+ cells with an ER antagonist or depriving them of estrogen decreases Axl expression [109, 118].

The study of Axl in breast cancer has led to the development of novel therapeutics, as well as a role in therapeutic resistance to other targeted therapies. Initial Axl-targeting strategies have employed anti-Axl polyclonal antibodies, and small molecule inhibitors which target multiple TKRs [117]. Since then, anti-Axl monoclonal antibodies have been developed, which have further validated the role of Axl in tumor growth and metastasis in breast cancer xenograft tumors [119]. Touching on the negative role of the TAM receptors in innate immunity, implications for immunotherapy in breast cancer have

arose based on the observation that therapeutic-resistant cancer stem cells have increased signaling through cooperation of SOCS and the TAM receptors, making them more susceptible to oncolytic adenovirus [120]. The use of bi-specific inhibitors was also proposed when it was discovered that Axl phosphorylates c-MET in response to Gas6 in TN breast cancer cells [121]. MP470 is a multikinase inhibitor which targets Axl, mutant *c-KIT*, and PDGFR $\alpha$ , and reverses EMT in breast cancer stem cells through the NF $\kappa$ B pathway [115]. On the other hand, a selective Axl inhibitor, R428, is still able to inhibit metastasis and angiogenesis [122].

For many women, breast cancer therapy targets the HER2 receptor, but this treatment almost always eventually fails secondary to resistance by mechanisms which are currently being explored. Axl overexpression appears to be a contributor to resistance. Blocking Axl with the multikinase inhibitor GSK1363089 restores sensitivity to HER2/ER positive cells originally treated with lapatinib and trastuzumab [118]. Furthermore, Axl was identified from a database as being predictive of a lack of response to therapies targeting the ERBB receptor family. It was shown to be physically associated with, and transactivated by EGFR, leading to diversification beyond EGFR signaling alone [49]. Notably, Axl also associated with MET and PDGFR.

## Lung

The regulation of the innate immune system by Axl has implications in the lung. Activation of Axl decreases inflammation in a cell model of LPS-induced acute lung injury through the inhibition of cytokine signaling [6]. In respiratory viruses, an anti-Axl monoclonal antibody is able to extinguish many consequences of infection by boosting the antiviral immune response with type I IFN, as well as inhibiting allergic inflammatory responses [123]. Further support for targeting Axl in respiratory diseases comes from a subsequent study in which Gas6 plasma levels are elevated by M2 macrophages in clinical asthma, driving T cell activation through Axl expression on dendritic cells [124].

Pleural mesothelioma is a cancer that is highly dependent on RTK signaling for proliferation, and is often chemotherapy-resistant [125]. Axl is among the RTKs involved, and its expression is found to be higher than in other cancers in which it plays a role [126]. Inhibition of Axl in mesothelioma cell lines inhibits migration and invasion, but the major function of Axl in mesothelioma is to promote proliferation [126]. Axl induces proliferation through a PI3K/Akt/mTOR axis, and inhibition of Axl leads to G1 growth arrest [126, 127]. Overexpression of Axl alone is able to predict patient survival, but selective RTK inhibition in mesothelioma has not been effective, as in the case of EGFR inhibitors [125, 128]. Therefore, targeting an array of RTKs might be a more suitable approach to take in treating mesothelioma patients [125].

One of the earliest accounts of Axl in lung cancer was due to its expression correlation in adherent cultures of lung cancer versus suspension cultures, owing to the structural adhesion features in its extracellular domain [28]. However, Axl expression seems to be a consequence of inducing adhesion in suspension cultures, which also correlates with the type of lung cancer. Non-small cell lung cancer (NSCLC) grows as adherent cultures, whereas small cell lung cancer (SCLC) grows in suspension. Since then, Axl expression has been shown to correlate with many features of NSCLC [129–132]. Both protein and mRNA levels of Axl are associated with poor prognosis and pathological features of lung adenocarcinoma [131]. This holds true for Gas6 protein levels, whereas high Gas6 mRNA levels are actually related to better clinical outcome for patients [131]. Gas6 secretion by exogenous sources in the surrounding tumor environment may explain this inconsistency [131]. Furthermore, activated Axl is detected in the majority of lung adenocarcinoma cases, and correlates with increased tumor size [130]. In fact, recent *in vivo* imaging of Axl using an anti-Axl antibody in lung cancer xenografts has demonstrated to be of use in diagnosis, prognosis, and tumor monitoring [133].

Axl-mediated tumor growth is predicted to be through ERK, as an anti-Axl mAb inhibits its activation and decreases proliferation *in vitro* [130]. Axl may be positively regulated by YES-associated protein 1 (YAP1); knockdown of YAP decreases both Axl and PCNA expression, and inhibits proliferation of lung adenocarcinoma cells [129]. Different mutated forms of *p53* frequently drive lung cancer, and functional analysis has demonstrated that *Axl* is a transcriptional target of both WT and mutant *p53* [134]. Thus, *Axl* is induced by a driver of tumorigenicity, presenting a notion that drivers of cancer must have the ability to be mutated, whereas the lack of Axl activating mutations may place it in more of a passenger position, being recruited for cancer maintenance. Aside from transcriptional and translational regulation, a potential method of Axl activation has been found by transcriptome sequencing of primary lung adenocarcinomas, unveiling a novel fusion gene of *Axl* and *MBIP* [135]. The fusion gene retains the kinase domains and dimerization units, necessary for activation. Further investigation into the causes and consequences of this fusion event is warranted.

Axl is also involved in EMT and migration of lung cancer. Metastases of the lung usually end up in the lymph nodes, and Axl expression is seen to correlate with this status [132, 136]. Transfection of miR-34a and miR-199a, which target *Axl*, inhibits invasion in metastatic lung cancer cells and *in vivo* metastasis [62]. Migration may also occur through ROS activation of Axl with subsequent activation of PI3K/Akt and Rac1, and this would represent an adaptive characteristic of the tumor cell to oxidative stress [137]. Overexpression of *Axl* in cells induces filopodia formation and EMT-like morphology,

and their invasive potential is dependent on the first Ig domain on the N-terminus and on the kinase domain, but not on the two FN3 domains [138]. Furthermore, Axl signaling through NF $\kappa$ B might be part of this mechanism, as treatment with a NF $\kappa$ B inhibitor diminished the Axl-mediated invasiveness [138].

The participation of Axl in EMT is implicated in mechanisms of chemotherapy and TKI resistance. Since significant time has passed since the development of TKIs such as erlotinib and gefitinib, the overwhelming majority of Axl studies in lung cancer attempt to elucidate mechanisms of acquired resistance. More recently, Axl has been added to the list of common contributors of TKI resistance in lung cancer such as secondary mutations in EGFR, and overactivation of other genes like MET, HGF, and IGF1-R [139]. Patients with developed resistance to erlotinib due to mutations in *EGFR* also have increased levels of Axl [136, 140]. In these patients, Axl also promotes EMT, and inhibition of Axl restores erlotinib sensitivity in tumor models [140]. Axl can also act as a binding partner with EGFR upon HGF treatment in EGFR-mediated TKI-insensitive models, potentially contributing to a mode of resistance [141]. Chemotherapy resistance can influence acquired resistance to TKIs, and Axl has also been shown to increase cell motility in this setting [142]. Whether Axl upregulation is an overall inducer or a consequence of EMT is not clear, and may depend on the particular experimental or physiological setting. Studies of EMT in TKI resistance in lung cancer typically have implicated Axl as a marker of EMT, joining the rank of snail, twist, vimentin, and N-cadherin, to name a few [143–145]. EMT as a driver of erlotinib resistance has been proposed, where Axl is part of an EMT signature in resistant mesenchymal cells, which consequently have greater sensitivity to the Axl inhibitor, SGI-7079 [146]. Expression of Axl-altered miRNAs can induce resistance as well as EMT morphology and functional characteristics in gefitinib-sensitive cell lines, indicating a role for Axl as an EMT driver [147]. However, one study found that knockdown of *Axl* in generated erlotinib-resistant cells did not restore their sensitivity [148]. Protection from apoptosis as a mechanism of therapeutic resistance includes Axl as well – knockdown of *Axl* leads to NSCLC sensitivity by increasing apoptosis [149].

The role of Axl in lung cancer and in resistance to current therapies have sparked the development of Axl inhibitors for research and clinical use [150]. A high-throughput, high-content screen based off of Gas6-induced phosphorylation of Akt in a NSCLC cell line was recently developed as a tool for identifying potential new therapeutics [151]. Axl was recently identified as a target of apigenin, a natural product of plants with implications in chemoprevention [152, 153]. Another natural compound, epigallocatechin gallate (EGCG), induces cytotoxicity in lung cancer cells whether treated with or without cisplatin, by suppressing both Axl and Tyro3 [154]. Similarly, Met

and Axl can both be targeted by NPS-1034 in cells with acquired resistance to TKIs, leading to cell death [155]. A novel approach to Axl inhibition is the development of aptamer-miRNA conjugates, whereby targeting *Axl* reduces growth of tumor xenografts [156].

### Vascular smooth muscle/endothelial cells

Axl is highly expressed in vascular smooth muscle cells (VSMCs) and serves a protective role during vascular injury [157–159]. As in other cellular contexts, Axl exerts anti-apoptotic effects to mediate a variety of processes. Constitutive phosphorylation of Axl is observed in growth-arrested pulmonary artery endothelial cells, and addition of Gas6 further increases phosphorylation of Axl and leads to greater cell viability [107]. Inorganic phosphate (Pi) induces VSMC calcification through apoptosis, initially found to be through downregulation of Gas6/Axl interaction which can be restored by statins [160–162]. In the absence of Pi, normal anti-apoptotic effects are specifically due to Gas6/Axl activation of the PI3K/Akt pathway, leading to activation of NF $\kappa$ B and the anti-apoptotic member Bcl2 [163, 164]. Acidification as a result of hypercarbia also inhibits cellular apoptosis through Gas6/Axl activation [165]. Mild acidification can be a result of laminar shear stress due to tangential blood flow against vascular endothelial cells, leading to an array of signaling cascades and anti-apoptotic effects mediated by Axl [31]. Axl is upregulated in cells undergoing laminar stress compared to those in static flow, and its phosphorylation is independent of Gas6 [31]. Instead, Axl physically associates with  $\beta$ 3 integrin, promoting its own phosphorylation and anti-apoptotic effects [31]. Axl and its other family members can also stimulate the phosphorylation of  $\beta$ 3 integrin to promote platelet aggregation, potentially through their activation of PI3K/Akt, known to play a role in this process [166–168].

Restoring Axl function may be a therapeutic strategy in patients with disease linked to calcified blood vessels, such as atherosclerosis, diabetes, and kidney disease [169]. Axl and Gas6 upregulation may contribute to the observed reduction in atherosclerotic events within the left internal mammary artery, used for coronary artery bypass grafting, compared to in the aorta [170]. Advanced atherosclerotic plaques show decreased expression of Axl, whereas the expression of Mer and protein S is increased, consistent with the abundance of protein S known to be in the plasma [171]. Another study found that plasma Gas6 levels may be used as a biomarker in atherosclerotic disease, due to its correlation with high Gas6 and Axl expression in the aorta of CABG patients [172].

Response to vascular injury requires efficient migration and proliferation of cells, and this is mediated by signaling of growth factors through RTKs. Upregulation and secretion of Gas6, and subsequent activation of Axl is one aspect of vascular injury response. Both Axl

and sAxl are upregulated in heart failure patients, and sAxl may be of use as a diagnostic marker [173]. Cardiac fibroblasts respond to Gas6 and increase their proliferation through Axl-activated ERK [174]. *Axl* can be increased by thrombin or angiotensin II (Ang II), and activation by Gas6 leads to cell proliferation at the site of injury [175, 176]. Furthermore, the time over which Gas6/Axl signaling increases after injury parallels the timeline of the neointima formation [157]. Axl increases proliferation of cells by inhibiting apoptosis, and again, this is through activation of the PI3K/Akt pathway rather than through ERK1/2 [177]. In addition to mediating apoptosis at sites of vascular trauma, Axl signaling can regulate immune heterogeneity of vascular cells, the expression of cytokines and chemokines, and remodeling of the ECM [178]. Another important feature of vascular remodeling is the ability of cells to migrate, and just as Axl mediates EMT and migration in cancer models, it is able to increase migration in VSMCs by interacting with the myosin heavy chain (MHC)-IIB in response to Gas6-stimulated ROS production [179]. Oxidative stress plays a large role in vascular disease, as ROS is an important signaling molecule. In the setting of vascular injury, activation of Axl by ROS is partially ligand-independent, where inhibition of Gas6 somewhat decreases Axl phosphorylation [41]. ROS-activated Axl contributes to vascular pathology, making Axl an attractive therapeutic target [180].

Vascular remodeling in response to hypertension also uses Axl signaling to protect against apoptosis, but this contributes to endothelial dysfunction [181]. Increased vascular apoptosis in mice lacking *Axl* display lower systolic blood pressure [181]. Furthermore, hematopoietic expression of Axl is responsible for the initiation of salt hypertension due, in part, to the upregulation of IFN- $\gamma$  [182]. Thus, in this setting, Axl *promotes* the inflammatory response, unlike its normal anti-inflammatory role in the immune system. During pregnancy, severe preeclampsia correlates with elevated levels of plasma sAxl [183]. This form of Axl is complexed with Gas6, making it unavailable for signaling. Endothelial damage is supposedly a hallmark of preeclampsia, but the implications of reduced Axl signaling in this context are yet to be explained. Hypertension can also be a result of diabetes, in which VSMC signaling is altered by changes in glucose levels [184]. Glucose affects Axl signaling by altering its interactions with its binding partners – in low glucose, Axl associates with PI3K, but increased glucose leads to interaction with protein tyrosine phosphatase SHP-2 [185]. Consequently, Axl/PI3K interaction leads to increased cell survival, and Axl/SHP-2 interaction leads to increased migration through activation of ERK1/2 [185]. Another study found that high glucose is inversely correlated with plasma Gas6 levels, leading to decreased Axl signaling through Akt and increased adhesion in human microvascular endothelial cells [186].

Angiogenesis is a key feature of tumor growth, whereby vascular endothelial cells gain the ability to proliferate off of and extend existing vessels. Axl was first implicated in the process of angiogenesis in a search for RTKs expressed in the rheumatoid synovium of rheumatoid arthritis patients [187]. Gas6 was shown to protect human umbilical vein endothelial cells (HUVECs) from TNF $\alpha$ -mediated apoptosis [187]. Functional interaction with VEGF activates SFKs to mediate ligand-independent Axl activation and subsequent PI3K/Akt signaling [43]. However, Gas6 has been implicated as a negative regulator of angiogenesis, whereby stimulation of Axl in vascular endothelial cells results in the reversal of ligand-mediated VEGF activation by recruiting the tyrosine phosphatase SHP-2 [188].

In cancer models, simultaneous inhibition of Axl and VEGF effectively impairs tube formation, suggesting a potential method of intervention to prevent tumor growth and metastasis [119, 189]. Given that hypoxia drives angiogenesis within tumors, it is interesting to consider the role of Axl in response to hypoxia. As mentioned earlier, HIF1 $\alpha$  has been shown to bind *Axl* by CHIP analysis, and Axl signaling is stabilized in prostate cancer cells after treatment with CoCl<sub>2</sub>, a stabilizer of HIF1 $\alpha$ . Thus, within a tumor, the stabilization or upregulation of Axl by the hypoxic environment could also help to further promote angiogenesis.

Post-transcriptional upregulation of Gas6 is found to occur after lactate addition to HUVECs, and this engages Axl to promote PI3K/Akt signaling in angiogenesis [53]. An early study proposed Gas6 to be a chemoattractant for the migration of primary vascular endothelial cells, but without possessing significant mitogenic potential [190]. However, the first demonstration of VEGFR2-Axl crosstalk found that Gas6-activated Axl was antagonizing for vascularization, and that Gas6 inhibited chemotaxis of endothelial cells [188].

## Kidney

Axl is involved in various diseases of the kidney. Control of proliferation by Axl has been observed in glomerulonephritis, where treatment of mice with a low dose of warfarin inhibits glomerular proliferation [191]. Axl is upregulated in acute tubular necrosis associated with chronic rejection following renal transplantation, and this coincides with Gas6 levels [192]. Furthermore, albuminuria due to podocyte loss results in proliferation of the tubule cells as an adaptive response, possibly associated with the observed increase in Axl phosphorylation [193]. Axl is also localized to the tubular segments of the medulla after treatment of mice with an angiotensin-converting enzyme (ACE) inhibitor, used to prevent renal tubule atrophy, and an inhibitor of nitric oxide synthesis [194]. However, the upregulation of Axl in this situation is an unexpected result, as findings from



a previous study observed upregulation of Axl and Gas6 by Ang II and subsequent downregulation after inhibition of NADPH-oxidase [195]. These findings may heavily depend on the type of renal injury, but implicate Gas6/Axl signaling as an important aspect of renal disease.

The oncogenic role of Axl extends to renal cell carcinoma (RCC), where its expression is increased compared to in the normal kidney [196, 197]. Specifically, patients with low *Axl* and high Gas6 mRNA levels in the tumor have better prognosis than those without [198]. Better prognosis is also observed in patients with both low sAxl and Gas6 in their serum, but it is unknown whether these levels are affected by the output of surrounding cells [198]. Clear cell renal cell carcinoma (ccRCC) is often found to display genetic alteration of VHL, increasing angiogenic potential by stabilizing HIF1 $\alpha$  and HIF2 $\alpha$ , and increasing VEGF expression [199]. In a ccRCC cell line, expression of functional VHL decreases Axl protein levels, but *Axl* mRNA levels are unchanged [60]. Since VHL is a ubiquitin ligase, it may target Axl for protein degradation. The biology of Gas6/Axl signaling in ccRCC is complicated by the fact that it has been shown to inhibit VEGFR-dependent angiogenesis in vascular endothelial cells, but again, this may depend on cell type [60, 188]. Another study found that Axl expression is dependent on VHL in RCC, and that higher expression in endothelial cells correlates with better clinical outcome, consistent with Axl being an antagonist of angiogenesis in epithelial cells [200].

## Adipocytes

A general role of the TAM family has more significant consequences in adipose tissue compared to the somewhat controversial role of Axl alone. The first characterization of Gas6 and its receptors in adipose tissue found that Axl is only expressed in pre-adipocytes, while Gas6, Mer, and Tyro3 are expressed in both pre-adipocytes and mature adipocytes [201]. Axl was found to be downregulated upon adipocyte differentiation, supporting a role in maintaining an undifferentiated state, much like in other cell types discussed [202]. Small molecule inhibition of Axl impairs pre-adipocyte differentiation, consistent with the decrease in weight gain of mice on a high fat diet relative to untreated mice [203]. However, another study found that *Axl* deficiency does not affect adipogenesis, where Tyro3 and Mer may respond to Gas6 in order to compensate for Axl [204]. This somewhat supports the findings that circulating sAxl has no significant correlation with adiposity in adolescents, while Gas6 does [205]. Expression of Axl is increased in liposarcoma compared to both pre-adipocytes and differentiated adipocytes, and only one further study has found it to be a prognosticator of survival by univariate analysis [206, 207]. Considering the widely credited role of Axl in migration/metastasis of tumor cells, Axl may not indeed contribute significantly to liposarcoma, which is rarely metastatic.

## Skin

Axl becomes overexpressed in melanoma and squamous carcinomas, compared to normal cells of the epithelium [208, 209]. Probably the most significant consequence of Axl upregulation in carcinomas of the skin is increased migratory ability of cells. In melanoma, Axl is associated with NRAS mutations compared to BRAF mutations, and is inversely correlated with the expression of the microphthalmia-associated transcription factor (MITF) [210–213]. Correlation studies also reveal the association of Axl with cell motility, invasion, and interactions with the surrounding microenvironment, and treatment with R428, a selective Axl inhibitor, reduces migration and invasion of cells [213]. Knockdown of *Axl* has uncovered STAT3 signaling as a downstream modulator of cell migration [214]. Interestingly, melanomas harboring Tyro3 display a higher proliferation rate in more differentiated cells, and this is consistent with the roles of Tyro3 and Axl in prostate cancer metastasis, as cited previously [213]. The differential phenotypes governed by each of the two receptors may represent a molecular switch in the development of cancer. Another report found that Axl and Mer are expressed in a mutually exclusive manner, where Mer is associated with BRAF mutations and Axl is associated with NRAS mutations [215]. Accordingly, treatment of NRAS-mutant melanoma cell lines with an inhibitor targeting multiple kinases including Axl, leads to growth arrest and apoptosis [210]. This drug has no effect in BRAF-mutant cell lines which lack Axl expression. Furthermore, overexpression of Axl increases the migratory ability of cells and is associated with genetic markers of invasion, whereas Mer is associated with markers of cell proliferation but is not sufficient to induce proliferation [215]. Both *Axl* and *Mer* inversely correlate with the expression of MITF, although it has not been determined whether they are direct targets of the transcription factor [215]. The mutual expression of Axl and N-cadherin in a heterogeneous melanoma cell population also marks a more invasive phenotype, compared to expression of MITF and E-cadherin [212]. Together, this suggests the effective use of Axl as a molecular biomarker for MITF-lacking melanomas, in which cells are less differentiated and have higher migratory ability.

Axl is widely implicated in mechanisms of therapeutic resistance in lung cancer, and is potentially linked to therapeutic resistance in melanoma. When melanoma cells are hit with chemotherapy and become senescent, they are able to alter the composition of their secretome toward being pro-inflammatory, and this has tumorigenic effects on neighboring melanoma-initiating cells [216]. Upregulation of Axl is an example of a molecular change in melanoma-initiating cells as a response to the secretome of cells undergoing senescence [216]. In mutant *BRAF*-harboring melanoma

cells that are resistant to MAPK inhibitors, MITF is downregulated whereas Axl and NF $\kappa$ B signaling is upregulated [217]. Inhibition of Axl is able to restore sensitivity of cells to RAF and MEK inhibitors, except to the inhibition of ERK.

Axl has similar roles in the progression of squamous cell carcinomas (SCC), where it is overexpressed and contributes to cellular migration and EMT. Axl has even been used as a marker of SCC in development of an *in vitro* 3D model of SCC [218]. Clinically, Axl expression correlates with poor prognosis and lymph node status of oral SCC patients, and Gas6 activation induces an EMT-like gene signature [219]. Alternatively, Axl can also exert anti-apoptotic effects in SCC after UV exposure, contributing to the growth of tumors through Akt and suppression of Bcl-2 family members [220]. As in melanoma, Axl may contribute to the resistance of SCC to chemotherapy. This is mainly due to its effects on EMT by disrupting cell-cell adhesion in cancer stem cells through Wnt and TGF $\beta$  signaling [27].

## CNS

The TAM receptors are important for CNS development, but have not been well characterized in cells specific to the PNS. However, Gas6 stimulation of Axl and Tyro3 has been shown to act as a mitogenic factor for Schwann cells with implications in schwannoma [26, 221].

Gas6 is widely expressed in the CNS beginning in the late embryonic stages, and this is in contrast with protein S expression [222]. Many processes in the brain are regulated by the cooperation of two or more TAM receptors [223]. TKO mice have significantly reduced neural stem cell (NSC) proliferation and differentiation [224]. Consistent with Tyro3 being the most widely expressed TAM receptor in the brain, much of Axl signaling is dependent upon it [225]. In the rat brain, the expression of Axl across tissues is slightly different from that of Tyro3 [40]. In GnRH neurons, Axl and Tyro3 are expressed in migrating cells, whereas Mer and Tyro3 are expressed after migration [44]. The GnRH promoter is negatively regulated by MEF-2 transcription factors which can be induced by Axl in migrating cells [226]. Axl/Tyro3 null mice also result in increased apoptotic rate of GnRH neurons, implicating a normal role in apoptotic protection [227]. Protection from serum starvation-induced apoptosis is through both the PI3K/Akt and ERK pathways [228]. Furthermore, nerve growth factor (NGF) can regulate the expression and localization of Tyro3 and Axl, contributing to induction of neuronal differentiation [229]. Differential expression of Axl and Mer may also be responsible for the differential activity of Gas6 in early- and late-phase maturation of chondrocytes in the growth plate [95]. Taken together, this may suggest a phenomenon in which the

ubiquitous expression of Tyro3 in the CNS can be altered to drive cell- and time-specific processes dependent upon the presence of either Axl or Mer. Overexpression of *Tyro3* in Axl-expressing Rat2 cells leads to a significant increase in cell proliferation, but this effect is not seen upon *Mer* overexpression, supporting this idea [46].

Alternatively, Axl and Mer are able to cooperate to inhibit Gas6 signaling in multiple sclerosis (MS), where they are found in their soluble forms [30]. The potential combination of Axl-mediated survival and Mer-mediated clearance of debris is thus inhibited, and may contribute to the pathology of MS [30]. In astrocytes, the combined signaling of Axl and Mer may account for chemotherapy resistance in astrocytoma patients [230]. Inhibition of Axl and Mer increases apoptosis and autophagy, and decreases cell colony formation, whereas restoration of either one alone does not compensate for these effects [230]. Microglia are macrophages of the brain, and just as Axl and Mer mediate macrophage engulfment of debris, they contribute to microglial phagocytosis of apoptotic cells and suppression of the immune response in the presence of Gas6 [224, 231]. However, just loss of *Axl* can also be responsible for increased axonal damage by inhibiting the ability of microglia to clear debris from demyelination [232, 233].

Axl mediates processes in the brain similar to in other cellular contexts. Anti-apoptotic signaling initiated by Gas6/Axl in cerebral endothelial cells is important for protection against hypertonicity induced by mannitol during clinical opening of the blood brain barrier for drug delivery [234]. In oligodendrocyte development, apoptotic inhibition by Gas6/Axl signaling is demonstrated to be through the PI3K/Akt pathway, specifically by recruiting GRB2 and the p85 subunit of PI3K [235, 236]. Thus, Gas6 is a key growth factor in the CNS. However, overactivation of pro-survival signaling by Gas6/Axl is involved in glioma growth and poor prognosis [158, 237, 238]. Expression of Axl in gliomas is also responsible for migration and invasion of cells, and may also contribute to maintenance of the neural stem/progenitor population [237, 239, 240]. Enhancer of zeste homolog 2 (EZH2) is a transcription factor that upregulates *Axl* expression in gliomas, and inhibition of EZH2 reduces invasiveness [241]. Additionally, Axl and Gas6 are coexpressed in tumor vessels, implying a role in neovascularization or angiogenesis [158].

Alzheimer's disease (AD) is another consequence of neuronal damage, and its pathogenesis may be caused, in part, by a deficiency in vitamin K. It is hypothesized that this directly affects Axl signaling in neurons because of the dependence of Gas6 on vitamin K for its  $\gamma$ -carboxylation and function as a growth factor [242]. Since Gas6/Axl signaling has been shown to protect neurons against apoptosis, lack of vitamin K would lead to increased apoptosis and neuronal damage [228]. In fact, Axl has been found to be a potential marker of brain amyloid burden associated with AD [243, 244].

## Eye

Axl signaling has implications in normal and disease processes in the eye. Axl is expressed in normal rat and bovine lens, specifically in the proliferating or quiescent epithelial cells in the periphery, rather than in differentiated cells [245]. There, Axl is responsible for maintaining cell proliferation and survival through the PI3K/Akt pathway [245]. Using an apoptosis-specific microarray chip to identify gene expression in the postnatal mouse lens, *Axl* was found to be developmentally regulated, implicating a normal role in development [246]. Another screen-based study found low levels of *Axl* in the normal rat retina, but increased levels after injury [247]. This is consistent with the role of Axl in helping to mediate clearance of apoptotic cells, as phagocytosis of apoptotic cells in the retina occurs when cells become photodamaged. Phagocytosis of apoptotic cells by retinal pigment epithelium (RPE) occurs via the same mechanism as macrophages in the immune response. However, instead of Gas6, photoreceptor-specific Tulp1 can bridge apoptotic cells and RPE cells through any of the TAM receptors [90]. During oxidative stress, the anti-aging gene Klotho increases RPE phagocytosis by upregulating TAM receptor expression through cAMP/PKA/CREB activation [248]. However, Axl may only have a small or supporting role in RPE clearance of apoptotic cells, as another study found that phagocytosis of apoptotic cells is cell-specific, where only Mer is required in the retina [45].

In addition to maintaining normal processes, Axl is involved in diseases of the eye. Axl is upregulated with age in the lens, as detected in a model of age-onset cataract [249]. Oxidative stress is a contributor to age-related cataract, and *Axl* transcript levels are upregulated in the acute response to H<sub>2</sub>O<sub>2</sub> treatment [250]. In uveal melanoma, Axl may be a key factor in maintaining the balance of proliferation, apoptosis, and angiogenic suppression needed for micrometastatic dormancy [251]. Gas6/Axl signaling decreases the angiogenic factor Cyr61, mildly protects cells from apoptosis, and increases cell proliferation [251]. Treatment of retinoblastoma cell lines with a therapeutic agent usually used for macular degeneration is able to inhibit growth and proliferation, and this is associated with decreased Axl expression [252]. As mentioned previously, YAP regulates the transcription of *Axl*, and treatment with this therapeutic downregulates YAP [252].

## Thyroid

Axl is normally expressed at none or very low levels in the thyroid, but its overexpression contributes to thyroid cancer [253, 254]. *Gas6* mRNA is also expressed in thyroid cancer cells where it has a slight mitogenic effect, and thus is considered a growth factor for Axl-expressing thyroid carcinoma cells [254]. Thyroid carcinomas

induced by exposure to radiation show increased levels of both Gas6 and Axl with reduced apoptosis, implying an autocrine activation of Axl [255]. Axl is faintly expressed in human thyroid adenomas and is highly expressed in carcinomas, with no expression in normal thyroid tissue [253]. However, in contrast to breast cancer, Axl does not correlate with lymph node metastasis [253]. CXCR4/SDF-1 signaling transcriptionally regulates both *Tyro3* and *Axl*, but silencing of just *Axl* leads to a decrease in cancer cell invasion, increased apoptosis, and inhibition of tumor formation due to inhibition of angiogenesis [256]. Expression of Axl along the spectrum of differentiated thyroid cancers is equal, indicating it is part of a cancer-initiating event, rather than a consequence [256]. Alternatively, one study found that Axl expression is decreased in tissue associated with malignancy, but elevated in the serum of patients with extrathyroidal invasion and lymph node metastasis [257]. These conflicting results may be attributed to the method of detection, as presence of Axl in the serum is most likely a result of the cleaved, soluble form. This may coincide with decreased detection of Axl in the tissues.

## Colon

The oncogenic properties of Axl have implications for the progression of colon carcinomas, as it is weakly expressed in the normal colon [258]. Axl is overexpressed in malignant cells, specifically in peritoneal metastases which represent the most aggressive form of colon cancer [258, 259]. MZF1 upregulates *Axl* and both genes positively correlate with colorectal tumors, where MZF1 induces invasion and metastasis [65]. Structurally similar to YAP, TAZ is also a transcriptional regulator of *Axl*, and in colorectal cancers correlates with shorter survival [260]. Therefore, both TAZ target genes *Axl* and *CTGF* are also predictors of patient survival, where patients expressing all three genes have worse prognosis than those that express just two or one [260]. Knockdown of TAZ decreases Axl expression, and leads to decreased proliferation, reduction in non-adherent colony formation, and decreased tumorigenesis [260]. Furthermore, genes associated with EMT are also overexpressed in patients expressing TAZ, Axl, and CTGF, in support of the more aggressive status of Axl-expressing tumors [260]. Consistent with this finding, knockdown of CXCR4 and Axl reduces invasion of colon cancer cells [261]. As in thyroid cancer, CXCR4/SDF-1 signaling leads to the transcriptional regulation of *Axl*, which has implications in metastasis [261]. Axl also contributes to chemoresistance in colon cancer, as it most prominently does in lung cancer [261]. The metastatic and invasive properties of Axl contribute to its role in resistance, as micrometastases lay dormant and thus are not susceptible to standard chemotherapy. Axl phosphorylation is increased in invasive colon cancer

cell lines, while RTKs involved in maintaining epithelial status are downregulated [262]. In this setting, inhibition of Axl leads to decreased STAT3, SFK, and Akt activities, consequently reducing cellular migration rate [262]. This relates to therapeutic resistance in that treatment of non-invasive parental colon cancer cell lines with an adjuvant leads to an increase in migration and invasion, but this increase is eliminated upon silencing of *Axl* [262]. In gastrointestinal stromal tumors, the upregulation of Axl in resistance to imatinib mesylate acts as a molecular switch from c-KIT expressing tumors [263].

These findings suggest that Axl may be a prognostic biomarker and therapeutic target in colorectal cancer. Targeting Axl in colorectal cancer may need to occur after or in combination with chemotherapy. A multikinase inhibitor to Axl, MET, and FGFR is only effective in preventing tumor growth after or in combination with a VEGF antagonist, and either treatment alone is not as effective [264]. Thus, Axl may play a secondary role in the dependency of the tumor [264]. It is important to note that studies of TAM receptor inhibition in the colon have revealed potential adverse effects of systemic therapies targeting TAM receptors, specifically Axl and Mer [91]. In addition to their oncogenic roles, Axl and Mer function to limit the inflammatory response in dendritic cells and macrophages, as previously explained. Since inflammation often sets the stage for cancer initiation, as in ulcerative colitis patients, Axl and Mer acquire a protective role [265]. Thus, targeted therapy against Axl and Mer in other cancers may compromise their ability to limit colonic inflammation, increasing the risk for inflammation-associated colorectal cancer [91]. It then becomes desirable to develop tumor-specific approaches to target Axl and Mer signaling.

## Liver

Tissue repair and regeneration as well as the hepatic immune system are essential aspects of normal liver homeostasis. Gas6/Axl signaling has important implications in these normal processes, as well as those involved in disease.

Gas6 and Axl are mainly expressed in oval cells of the liver, and not in hepatocytes [266]. Oval cells are precursors which differentiate and proliferate upon hepatic injury, and display some of the same surface markers as hematopoietic stem cells [267]. In these cells, Gas6 acts as a survival factor that protects against apoptosis during experimental serum deprivation, suggesting its role in maintaining the population of precursor cells during regeneration [266]. Oval cells are the secondary response to hepatic injury, in the situation where hepatic stellate cells (HSCs) are unable to proliferate. HSCs are mature cells that are responsible for the liver's regenerative ability, and which accumulate at the site of injury and

transform into cytokine-secreting myofibroblasts [268]. Just as Gas6 is a survival factor for oval cells, it is upregulated and has the same function in HSCs after treatment with CCl<sub>4</sub>, an injury-mimicking agent known to induce HSC regeneration [269]. Axl is also expressed in HSCs, and signals through the PI3K/Akt and NFκB pathways to protect against apoptosis [269]. Axl and Gas6 are expressed in macrophages near the site of injury, which may aid in the uptake of apoptotic cells that occurs before regeneration [269]. Not surprisingly, injection of CCl<sub>4</sub> into *Gas6*-deficient mice leads to impaired liver repair and decreased cytokine synthesis, through SOCS1 induction by Axl in a *Gas6*-independent manner [5]. Further studies with *Gas6*<sup>-/-</sup> mice have implicated the Gas6/Axl pathway in the progression of steatohepatitis and fibrosis [270]. Consistent with the function of Axl in limiting the immune response in the liver, knockout of all three TAM receptors leads to dramatic liver damage due to inflammation, demonstrating their essential role in the immune tolerance of the liver [271].

Axl is found to be upregulated in hepatocellular carcinoma (HCC) tumors compared to normal hepatocytes, but these observations are variable, and Axl seems to be more associated with lymph node metastasis [272–276]. Knockdown of *Axl* in metastatic HCC cells inhibits their metastasis to lymph nodes *in vivo*, which may be due to the Gas6/Axl mediated decrease in Cyr61, an angiogenic factor also regulated by Gas6/Axl in the eye [277]. Gas6 activation of Axl is able to induce the EMT-associated transcription factor Slug, but not Snail, Twist, or Zeb1/2 in HCC cells [275]. This is through activation of ERK, and leads to invasion and migration of cells [275]. Interestingly, this study did not detect increased levels of Axl or Gas6 in HCCs compared to normal liver tissue, implying that the migratory effects downstream of Axl are not due to its activation by Gas6, but by activation in a ligand-independent manner [275]. Another study found Axl modulation of the PI3K/Akt pathway to be responsible for the enhanced migratory ability of a metastatic HCC cell line, and that Axl expression correlates with pathological features of HCC in patients including lymph node metastasis [274].

The regulation of Axl in HCC has been explored, and is similar to in other cell contexts. As in lung cancer, YAP has oncogenic implications in the liver and requires Axl for migration, invasion, proliferation, and survival of YAP-transformed HCC cells [68]. Oncogenic signaling by YAP is partly due to Axl activation of ERK1/2 signaling [68]. The deglycosylation of Axl by tunicamycin was shown to inhibit the proliferation and lymph node metastasis of a metastatic HCC line [278]. However, the global inhibition of glycoprotein synthesis induced by tunicamycin may also induce off-target effects partly responsible for the observed effects of the study. Loss of miR-122, a microRNA involved

in the maintenance of hepatic function in mice, leads to increased expression of *Axl*, which was found to be a target of miR-122 in HCC [279]. miR-122 deficiency in the liver is associated with tumor formation, and thus the subsequent upregulation of *Axl* may be responsible for miR-122-associated tumorigenesis [279].

### Clinical implications for Axl

After examining the role of Axl in each cell type, it is evident that therapeutic targeting of Axl would be beneficial in disease, specifically in cancer. It is also evident that its role in each cell type is distinct and depends on other surrounding factors. Thus, development of Axl-targeted therapeutics for specific cancers requires knowledge about what Axl regulates, what regulates Axl, and what interacts with Axl in each context. The conflicting roles of Axl/Mer in limiting the immune response while also promoting tumorigenesis has already been implicated as a therapeutic obstacle, and further supports the necessity for cell- or tumor-specific treatments [91].

Significant progress has been made in the development of Axl inhibitors since the late discovery of Axl in 1991. One of the most frequently used and most potent Axl inhibitors in the laboratory setting, BGB324 (formerly R428), is the first small molecule inhibitor of Axl to enter clinical trials. It is currently in phase I trials,

and its clinical response is to be assessed in AML and NSCLC patients. Other Axl inhibitors in development and clinical trials are listed in Table 3, and are further described in Feneyrolles, et al. [280]. It is unlikely that selective inhibition of Axl will be an effective monotherapy in cancer. Taken together, the literature has revealed an apparent passenger, rather than driver, role for Axl in the progression and resistance of tumors. Selective inhibition of Axl may be effective in tumors which have already, or are predicted to become, resistant to other therapies.

### Concluding remarks

Axl has emerged as a critical player in the immune response and in cancer. Axl is usually expressed at lower levels in normal tissue compared to in the disease state, indicating an oncogenic role for the receptor. There are several reasons to suggest that Axl functions to support processes which have already undergone an initiating step: (1) the lack of known activating mutations, (2) the lack of its ability to transform cells, as demonstrated in its initial characterization, (3) the lack of a major role in development, and (4) its overexpression/overactivation in therapeutic resistance.

Axl signals through and amplifies existing pathways rather than through any “Axl-specific” pathway. Axl is cooperative in nature and future research will hopefully identify functional relationships with its other family

**Table 3: Axl inhibitors in pre-clinical and clinical stages.**

| Name                   | Target(s)                                                     | Development Status | Reference (with Axl) |
|------------------------|---------------------------------------------------------------|--------------------|----------------------|
| SGI-7079               | Axl, FLT3, Mer, MET, TrkA/B, Ret, Yes, Jak2, VEGFR2, JNK3 Abl | Pre-clinical       | [146]                |
| GL21.T                 | Axl                                                           | Pre-clinical       | [283]                |
| NPS-1034               | MET, Axl                                                      | Pre-clinical       | [155]                |
| TP-0903                | Axl                                                           | Pre-clinical       | (Tolero website)     |
| BGB324 (R428)          | Axl                                                           | Phase I            | [122]                |
| SU11248 (Sunitinib)    | FLT3, VEGFR2, KIT, Axl                                        | Phase I            | [284]                |
| S49076                 | MET, Axl/Mer, FGFR1/2/3                                       | Phase I            | [264]                |
| LY2801653              | Ron, MET, MST1R, FLT3, Axl, Mer, TEK, ROS1, DDR1/2, MKNK1/2   | Phase I            | [285]                |
| BMS777607              | MET, Ron, FLT3, Axl, Mer, Tyro3                               | Phase I            | [286]                |
| MGCD265                | MET, Ron, VEGFR1/2/3, Tie-2, Axl                              | Phase II           | [280]                |
| SKI606 (Bosutinib)     | Axl, SRC/Abl                                                  | Phase II           | [117]                |
| MP470 (Amuvatinib)     | KIT, PDGFR $\alpha$ , Axl                                     | Phase II           | [263]                |
| GSK1363089 (Foretinib) | Axl, MET, VEGFR2, Ron, Tie2, KIT                              | Phase II           | [118]                |
| XL184 (Cabozantinib)   | MET, VEGFR2, RET, KIT, Axl, FLT3                              | Phase III          | [287]                |

members, Tyro3 and Mer. It is clear that the consequence of Axl signaling varies between cell type and depends on the presence of other signaling molecules, so it is crucial to establish an understanding of this within each context.

### Financial support

This work is financially supported by the NCI (grant no. U54CA143803, CA163124, CA093900 and CA143055 to K.J. Pienta).

### Conflicts of interest

Nothing to declare.

### REFERENCES

1. Graham DK, Dawson TL, Mullaney DL, Snodgrass HR, Earp HS. Cloning and mRNA expression analysis of a novel human protooncogene, c-mer. *Cell growth & differentiation: the molecular biology journal of the American Association for Cancer Research*. 1994; 5:647–657.
2. O'Bryan JP, Frye RA, Cogswell PC, Neubauer A, Kitch B, Prokop C, Espinosa R, 3rd, Le Beau MM, Earp HS, Liu ET. axl, a transforming gene isolated from primary human myeloid leukemia cells, encodes a novel receptor tyrosine kinase. *Molecular and cellular biology*. 1991; 11: 5016–5031.
3. Ohashi K, Mizuno K, Kuma K, Miyata T, Nakamura T. Cloning of the cDNA for a novel receptor tyrosine kinase, Sky, predominantly expressed in brain. *Oncogene*. 1994; 9:699–705.
4. Hafizi S, Dahlback B. Gas6 and protein S. Vitamin K-dependent ligands for the Axl receptor tyrosine kinase subfamily. *The FEBS journal*. 2006; 273:5231–5244.
5. Lafdil F, Chobert MN, Deveaux V, Zafrani ES, Mavier P, Nakano T, Laperche Y, Brouillet A. Growth arrest-specific protein 6 deficiency impairs liver tissue repair after acute toxic hepatitis in mice. *Journal of hepatology*. 2009; 51:55–66.
6. Takagi T, Taguchi O, Aoki S, Toda M, Yamaguchi A, Fujimoto H, Boveda-Ruiz D, Gil-Bernabe P, Ramirez AY, Naito M, Yano Y, D'Alessandro-Gabazza CN, Fujiwara A, Takei Y, Morser J, Gabazza EC. Direct effects of protein S in ameliorating acute lung injury. *Journal of thrombosis and haemostasis: JTH*. 2009; 7:2053–2063.
7. Friedman PA, Przysiecki CT. Vitamin K-dependent carboxylation. *The International journal of biochemistry*. 1987; 19:1–7.
8. Yanagita M, Ishii K, Ozaki H, Arai H, Nakano T, Ohashi K, Mizuno K, Kita T, Doi T. Mechanism of inhibitory effect of warfarin on mesangial cell proliferation. *Journal of the American Society of Nephrology: JASN*. 1999; 10:2503–2509.
9. Rajotte I, Hasanbasic I, Blostein M. Gas6-mediated signaling is dependent on the engagement of its gamma-carboxyglutamic acid domain with phosphatidylserine. *Biochemical and biophysical research communications*. 2008; 376:70–73.
10. Hasanbasic I, Rajotte I, Blostein M. The role of gamma-carboxylation in the anti-apoptotic function of gas6. *Journal of thrombosis and haemostasis: JTH*. 2005; 3: 2790–2797.
11. Tanabe K, Nagata K, Ohashi K, Nakano T, Arita H, Mizuno K. Roles of gamma-carboxylation and a sex hormone-binding globulin-like domain in receptor-binding and in biological activities of Gas6. *FEBS letters*. 1997; 408:306–310.
12. Manfioletti G, Brancolini C, Avanzi G, Schneider C. The protein encoded by a growth arrest-specific gene (gas6) is a new member of the vitamin K-dependent proteins related to protein S, a negative coregulator in the blood coagulation cascade. *Molecular and cellular biology*. 1993; 13:4976–4985.
13. Rebay I, Fleming RJ, Fehon RG, Cherbas L, Cherbas P, Artavanis-Tsakonas S. Specific EGF repeats of Notch mediate interactions with Delta and Serrate: implications for Notch as a multifunctional receptor. *Cell*. 1991; 67:687–699.
14. Balogh I, Hafizi S, Stenhoff J, Hansson K, Dahlback B. Analysis of Gas6 in human platelets and plasma. *Arteriosclerosis, thrombosis, and vascular biology*. 2005; 25:1280–1286.
15. Dahlback B, Villoutreix BO. The anticoagulant protein C pathway. *FEBS letters*. 2005; 579:3310–3316.
16. Ekman C, Stenhoff J, Dahlback B. Gas6 is complexed to the soluble tyrosine kinase receptor Axl in human blood. *Journal of thrombosis and haemostasis: JTH*. 2010; 8: 838–844.
17. Stitt TN, Conn G, Gore M, Lai C, Bruno J, Radziejewski C, Mattsson K, Fisher J, Gies DR, Jones PF, et al. The anticoagulation factor protein S and its relative, Gas6, are ligands for the Tyro 3/Axl family of receptor tyrosine kinases. *Cell*. 1995; 80:661–670.
18. Nagata K, Ohashi K, Nakano T, Arita H, Zong C, Hanafusa H, Mizuno K. Identification of the product of growth arrest-specific gene 6 as a common ligand for Axl, Sky, and Mer receptor tyrosine kinases. *The Journal of biological chemistry*. 1996; 271:30022–30027.
19. Schneider C, King RM, Philipson L. Genes specifically expressed at growth arrest of mammalian cells. *Cell*. 1988; 54:787–793.
20. Liu E, Hjelle B, Bishop JM. Transforming genes in chronic myelogenous leukemia. *Proceedings of the National Academy of Sciences of the United States of America*. 1988; 85:1952–1956.
21. Janssen JW, Schulz AS, Steenvoorden AC, Schmidberger M, Strehl S, Ambros PF, Bartram CR. A novel

- putative tyrosine kinase receptor with oncogenic potential. *Oncogene*. 1991; 6:2113–2120.
22. Verma A, Warner SL, Vankayalapati H, Bearss DJ, Sharma S. Targeting Axl and Mer kinases in cancer. *Molecular cancer therapeutics*. 2011; 10:1763–1773.
  23. Revil T, Toutant J, Shkreta L, Garneau D, Cloutier P, Chabot B. Protein kinase C-dependent control of Bcl-x alternative splicing. *Molecular and cellular biology*. 2007; 27:8431–8441.
  24. Sasaki T, Knyazev PG, Clout NJ, Cheburkin Y, Gohring W, Ullrich A, Timpl R, Hohenester E. Structural basis for Gas6-Axl signalling. *The EMBO journal*. 2006; 25: 80–87.
  25. McCloskey P, Fridell YW, Attar E, Villa J, Jin Y, Varnum B, Liu ET. GAS6 mediates adhesion of cells expressing the receptor tyrosine kinase Axl. *The Journal of biological chemistry*. 1997; 272:23285–23291.
  26. Ammoun S, Provenzano L, Zhou L, Barczyk M, Evans K, Hilton DA, Hafizi S, Hanemann CO. Axl/Gas6/NFkappaB signalling in schwannoma pathological proliferation, adhesion and survival. *Oncogene*. 2014; 33:336–346.
  27. Cichon MA, Szentpetery Z, Caley MP, Papadakis ES, Mackenzie IC, Brennan CH, O'Toole EA. The receptor tyrosine kinase Axl regulates cell-cell adhesion and stemness in cutaneous squamous cell carcinoma. *Oncogene*. 2013.
  28. Wimmel A, Glitz D, Kraus A, Roeder J, Schuermann M. Axl receptor tyrosine kinase expression in human lung cancer cell lines correlates with cellular adhesion. *European journal of cancer (Oxford, England: 1990)*. 2001; 37: 2264–2274.
  29. O'Bryan JP, Fridell YW, Koski R, Varnum B, Liu ET. The transforming receptor tyrosine kinase, Axl, is post-translationally regulated by proteolytic cleavage. *The Journal of biological chemistry*. 1995; 270:551–557.
  30. Weinger JG, Omari KM, Marsden K, Raine CS, Shafit-Zagardo B. Up-regulation of soluble Axl and Mer receptor tyrosine kinases negatively correlates with Gas6 in established multiple sclerosis lesions. *The American journal of pathology*. 2009; 175:283–293.
  31. D'Arcangelo D, Ambrosino V, Giannuzzo M, Gaetano C, Capogrossi MC. Axl receptor activation mediates laminar shear stress anti-apoptotic effects in human endothelial cells. *Cardiovascular research*. 2006; 71:754–763.
  32. Costa M, Bellosta P, Basilico C. Cleavage and release of a soluble form of the receptor tyrosine kinase ARK in vitro and in vivo. *Journal of cellular physiology*. 1996; 168:737–744.
  33. Park IK, Mishra A, Chandler J, Whitman SP, Marcucci G, Caligiuri MA. Inhibition of the receptor tyrosine kinase Axl impedes activation of the FLT3 internal tandem duplication in human acute myeloid leukemia: implications for Axl as a potential therapeutic target. *Blood*. 2013; 121:2064–2073.
  34. Rankin EB, Fuh KC, Taylor TE, Krieg AJ, Musser M, Yuan J, Wei K, Kuo CJ, Longacre TA, Giaccia AJ. AXL is an essential factor and therapeutic target for metastatic ovarian cancer. *Cancer research*. 2010; 70:7570–7579.
  35. Manning G, Whyte DB, Martinez R, Hunter T, Sudarsanam S. The protein kinase complement of the human genome. *Science (New York, NY)*. 2002; 298: 1912–1934.
  36. Faust M, Ebensperger C, Schulz AS, Schleithoff L, Hameister H, Bartram CR, Janssen JW. The murine ufo receptor: molecular cloning, chromosomal localization and in situ expression analysis. *Oncogene*. 1992; 7: 1287–1293.
  37. Gassmann M, Casagrande F, Orioli D, Simon H, Lai C, Klein R, Lemke G. Aberrant neural and cardiac development in mice lacking the ErbB4 neuregulin receptor. *Nature*. 1995; 378:390–394.
  38. Lu Q, Gore M, Zhang Q, Camenisch T, Boast S, Casagrande F, Lai C, Skinner MK, Klein R, Matsushima GK, Earp HS, Goff SP, Lemke G. Tyro-3 family receptors are essential regulators of mammalian spermatogenesis. *Nature*. 1999; 398:723–728.
  39. Lu Q, Lemke G. Homeostatic regulation of the immune system by receptor tyrosine kinases of the Tyro 3 family. *Science (New York, NY)*. 2001; 293:306–311.
  40. Bellosta P, Costa M, Lin DA, Basilico C. The receptor tyrosine kinase ARK mediates cell aggregation by homophilic binding. *Molecular and cellular biology*. 1995; 15: 614–625.
  41. Konishi A, Aizawa T, Mohan A, Korshunov VA, Berk BC. Hydrogen peroxide activates the Gas6-Axl pathway in vascular smooth muscle cells. *The Journal of biological chemistry*. 2004; 279:28766–28770.
  42. Valverde P. Effects of Gas6 and hydrogen peroxide in Axl ubiquitination and downregulation. *Biochemical and biophysical research communications*. 2005; 333:180–185.
  43. Ruan GX, Kazlauskas A. Axl is essential for VEGF-A-dependent activation of PI3K/Akt. *The EMBO journal*. 2012; 31:1692–1703.
  44. Pierce A, Bliesner B, Xu M, Nielsen-Preiss S, Lemke G, Tobet S, Wierman ME. Axl and Tyro3 modulate female reproduction by influencing gonadotropin-releasing hormone neuron survival and migration. *Molecular endocrinology (Baltimore, Md)*. 2008; 22:2481–2495.
  45. Seitz HM, Camenisch TD, Lemke G, Earp HS, Matsushima GK. Macrophages and dendritic cells use different Axl/Mertk/Tyro3 receptors in clearance of apoptotic cells. *Journal of immunology (Baltimore, Md: 1950)*. 2007; 178:5635–5642.
  46. Brown JE, Krodell M, Pazos M, Lai C, Prieto AL. Cross-phosphorylation, signaling and proliferative functions of the Tyro3 and Axl receptors in Rat2 cells. *PloS one*. 2012; 7:e36800.

47. Rothlin CV, Ghosh S, Zuniga EI, Oldstone MB, Lemke G. TAM receptors are pleiotropic inhibitors of the innate immune response. *Cell*. 2007; 131:1124–1136.
48. Park IK, Trotta R, Yu J, Caligiuri MA. Axl/Gas6 pathway positively regulates FLT3 activation in human natural killer cell development. *European journal of immunology*. 2013; 43:2750–2755.
49. Meyer AS, Miller MA, Gertler FB, Lauffenburger DA. The receptor AXL diversifies EGFR signaling and limits the response to EGFR-targeted inhibitors in triple-negative breast cancer cells. *Science signaling*. 2013; 6:ra66.
50. Salian-Mehta S, Xu M, Wierman ME. AXL and MET crosstalk to promote gonadotropin releasing hormone (GnRH) neuronal cell migration and survival. *Molecular and cellular endocrinology*. 2013; 374:92–100.
51. Park IK, Giovenzana C, Hughes TL, Yu J, Trotta R, Caligiuri MA. The Axl/Gas6 pathway is required for optimal cytokine signaling during human natural killer cell development. *Blood*. 2009; 113:2470–2477.
52. Nielsen-Preiss SM, Allen MP, Xu M, Linseman DA, Pawlowski JE, Bouchard RJ, Varnum BC, Heidenreich KA, Wierman ME. Adhesion-related kinase induction of migration requires phosphatidylinositol-3-kinase and ras stimulation of rac activity in immortalized gonadotropin-releasing hormone neuronal cells. *Endocrinology*. 2007; 148:2806–2814.
53. Ruan GX, Kazlauskas A. Lactate engages receptor tyrosine kinases Axl, Tie2, and vascular endothelial growth factor receptor 2 to activate phosphoinositide 3-kinase/Akt and promote angiogenesis. *The Journal of biological chemistry*. 2013; 288:21161–21172.
54. Liu R, Gong M, Li X, Zhou Y, Gao W, Tulpule A, Chaudhary PM, Jung J, Gill PS. Induction, regulation, and biologic function of Axl receptor tyrosine kinase in Kaposi sarcoma. *Blood*. 2010; 116:297–305.
55. Demarchi F, Verardo R, Varnum B, Brancolini C, Schneider C. Gas6 anti-apoptotic signaling requires NF-kappa B activation. *The Journal of biological chemistry*. 2001; 276:31738–31744.
56. Braunger J, Schleithoff L, Schulz AS, Kessler H, Lammers R, Ullrich A, Bartram CR, Janssen JW. Intracellular signaling of the Ufo/Axl receptor tyrosine kinase is mediated mainly by a multi-substrate docking-site. *Oncogene*. 1997; 14:2619–2631.
57. Hafizi S, Alindri F, Karlsson R, Dahlback B. Interaction of Axl receptor tyrosine kinase with C1-TEN, a novel C1 domain-containing protein with homology to tensin. *Biochemical and biophysical research communications*. 2002; 299:793–800.
58. Thien CB, Langdon WY. Cbl: many adaptations to regulate protein tyrosine kinases. *Nature reviews Molecular cell biology*. 2001; 2:294–307.
59. Peschard P, Park M. Escape from Cbl-mediated downregulation: a recurrent theme for oncogenic deregulation of receptor tyrosine kinases. *Cancer cell*. 2003; 3: 519–523.
60. Gustafsson A, Bostrom AK, Ljungberg B, Axelson H, Dahlback B. Gas6 and the receptor tyrosine kinase Axl in clear cell renal cell carcinoma. *PloS one*. 2009; 4: e7575.
61. Mishra A, Wang J, Shiozawa Y, McGee S, Kim J, Jung Y, Joseph J, Berry JE, Havens A, Pienta KJ, Taichman RS. Hypoxia stabilizes GAS6/Axl signaling in metastatic prostate cancer. *Molecular cancer research: MCR*. 2012; 10:703–712.
62. Mudduluru G, Ceppi P, Kumarswamy R, Scagliotti GV, Papotti M, Allgayer H. Regulation of Axl receptor tyrosine kinase expression by miR-34a and miR-199a/b in solid cancer. *Oncogene*. 2011; 30:2888–2899.
63. Manalo DJ, Rowan A, Lavoie T, Natarajan L, Kelly BD, Ye SQ, Garcia JG, Semenza GL. Transcriptional regulation of vascular endothelial cell responses to hypoxia by HIF-1. *Blood*. 2005; 105:659–669.
64. Mimura I, Nangaku M, Kanki Y, Tsutsumi S, Inoue T, Kohro T, Yamamoto S, Fujita T, Shimamura T, Suehiro J, Taguchi A, Kobayashi M, Tanimura K, Inagaki T, Tanaka T, Hamakubo T, et al. Dynamic change of chromatin conformation in response to hypoxia enhances the expression of GLUT3 (SLC2A3) by cooperative interaction of hypoxia-inducible factor 1 and KDM3A. *Molecular and cellular biology*. 2012; 32:3018–3032.
65. Mudduluru G, Vajkoczy P, Allgayer H. Myeloid zinc finger 1 induces migration, invasion, and in vivo metastasis through Axl gene expression in solid cancer. *Molecular cancer research: MCR*. 2010; 8:159–169.
66. Dufies M, Jacquelin A, Belhacene N, Robert G, Cluzeau T, Luciano F, Cassuto JP, Raynaud S, Auberger P. Mechanisms of AXL overexpression and function in Imatinib-resistant chronic myeloid leukemia cells. *Oncotarget*. 2011; 2:874–885.
67. Mudduluru G, Leupold JH, Stroebel P, Allgayer H. PMA up-regulates the transcription of Axl by AP-1 transcription factor binding to TRE sequences via the MAPK cascade in leukaemia cells. *Biology of the cell/under the auspices of the European Cell Biology Organization*. 2010; 103:21–33.
68. Xu MZ, Chan SW, Liu AM, Wong KF, Fan ST, Chen J, Poon RT, Zender L, Lowe SW, Hong W, Luk JM. AXL receptor kinase is a mediator of YAP-dependent oncogenic functions in hepatocellular carcinoma. *Oncogene*. 2011; 30:1229–1240.
69. Lee WP, Liao Y, Robinson D, Kung HJ, Liu ET, Hung MC. Axl-gas6 interaction counteracts E1A-mediated cell growth suppression and proapoptotic activity. *Molecular and cellular biology*. 1999; 19:8075–8082.
70. Mudduluru G, Allgayer H. The human receptor tyrosine kinase Axl gene-promoter characterization and regulation of constitutive expression by Sp1, Sp3



- and CpG methylation. *Bioscience reports*. 2008; 28: 161–176.
71. Hong CC, Lay JD, Huang JS, Cheng AL, Tang JL, Lin MT, Lai GM, Chuang SE. Receptor tyrosine kinase AXL is induced by chemotherapy drugs and overexpression of AXL confers drug resistance in acute myeloid leukemia. *Cancer letters*. 2008; 268:314–324.
  72. Choufani S, Shapiro JS, Susiarjo M, Butcher DT, Grafodatskaya D, Lou Y, Ferreira JC, Pinto D, Scherer SW, Shaffer LG, Coullin P, Caniggia I, Beyene J, Slim R, Bartolomei MS, Weksberg R. A novel approach identifies new differentially methylated regions (DMRs) associated with imprinted genes. *Genome research*. 2011; 21: 465–476.
  73. Boks MP, Derks EM, Weisenberger DJ, Strengman E, Janson E, Sommer IE, Kahn RS, Ophoff RA. The relationship of DNA methylation with age, gender and genotype in twins and healthy controls. *PloS one*. 2009; 4:e6767.
  74. Neubauer A, Fiebeler A, Graham DK, O'Bryan JP, Schmidt CA, Barckow P, Serke S, Siegert W, Snodgrass HR, Huhn D, et al. Expression of *axl*, a transforming receptor tyrosine kinase, in normal and malignant hematopoiesis. *Blood*. 1994; 84:1931–1941.
  75. Dormady SP, Zhang XM, Basch RS. Hematopoietic progenitor cells grow on 3T3 fibroblast monolayers that overexpress growth arrest-specific gene-6 (GAS6). *Proceedings of the National Academy of Sciences of the United States of America*. 2000; 97:12260–12265.
  76. Dormady SP, Bashayan O, Dougherty R, Zhang XM, Basch RS. Immortalized multipotential mesenchymal cells and the hematopoietic microenvironment. *Journal of hematotherapy & stem cell research*. 2001; 10:125–140.
  77. Tang H, Chen S, Wang H, Wu H, Lu Q, Han D. TAM receptors and the regulation of erythropoiesis in mice. *Haematologica*. 2009; 94:326–334.
  78. Wang H, Chen S, Chen Y, Wang H, Wu H, Tang H, Xiong W, Ma J, Ge Y, Lu Q, Han D. The role of Tyro 3 subfamily receptors in the regulation of hemostasis and megakaryocytopoiesis. *Haematologica*. 2007; 92:643–650.
  79. Rochlitz C, Lohri A, Bacchi M, Schmidt M, Nagel S, Fopp M, Fey MF, Herrmann R, Neubauer A. *Axl* expression is associated with adverse prognosis and with expression of *Bcl-2* and *CD34* in de novo acute myeloid leukemia (AML): results from a multicenter trial of the Swiss Group for Clinical Cancer Research (SAKK). *Leukemia*. 1999; 13:1352–1358.
  80. Ben-Batalla I, Schultze A, Wroblewski M, Erdmann R, Heuser M, Waizenegger JS, Riecken K, Binder M, Schewe D, Sawall S, Witzke V, Cubas-Cordova M, Janning M, Wellbrock J, Fehse B, Hagel C, et al. *Axl*, a prognostic and therapeutic target in acute myeloid leukemia mediates paracrine crosstalk of leukemia cells with bone marrow stroma. *Blood*. 2013; 122:2443–2452.
  81. Augustine KA, Rossi RM, Van G, Housman J, Stark K, Danilenko D, Varnum B, Medlock E. Noninsulin-dependent diabetes mellitus occurs in mice ectopically expressing the human *Axl* tyrosine kinase receptor. *Journal of cellular physiology*. 1999; 181:433–447.
  82. Ghosh AK, Secreto C, Boysen J, Sassoon T, Shanafelt TD, Mukhopadhyay D, Kay NE. The novel receptor tyrosine kinase *Axl* is constitutively active in B-cell chronic lymphocytic leukemia and acts as a docking site of non-receptor kinases: implications for therapy. *Blood*. 2011; 117:1928–1937.
  83. Ghosh AK, Secreto CR, Knox TR, Ding W, Mukhopadhyay D, Kay NE. Circulating microvesicles in B-cell chronic lymphocytic leukemia can stimulate marrow stromal cells: implications for disease progression. *Blood*. 2010; 115:1755–1764.
  84. Caraux A, Lu Q, Fernandez N, Riou S, Di Santo JP, Raulet DH, Lemke G, Roth C. Natural killer cell differentiation driven by *Tyro3* receptor tyrosine kinases. *Nature immunology*. 2006; 7:747–754.
  85. Paolino M, Choidas A, Wallner S, Pranjic B, Uribealago I, Loeser S, Jamieson AM, Langdon WY, Ikeda F, Fededa JP, Cronin SJ, Nitsch R, Schultz-Fademrecht C, Eickhoff J, Menninger S, Unger A, et al. The E3 ligase *Cbl-b* and TAM receptors regulate cancer metastasis via natural killer cells. *Nature*. 2014; 507:508–512.
  86. Lemke G, Lu Q. Macrophage regulation by *Tyro 3* family receptors. *Current opinion in immunology*. 2003; 15:31–36.
  87. Nakano T, Ishimoto Y, Kishino J, Umeda M, Inoue K, Nagata K, Ohashi K, Mizuno K, Arita H. Cell adhesion to phosphatidylserine mediated by a product of growth arrest-specific gene 6. *The Journal of biological chemistry*. 1997; 272:29411–29414.
  88. Yu W, Zheng H, Lin W, Tajima A, Zhang Y, Zhang X, Zhang H, Wu J, Han D, Rahman NA, Korach KS, Gao GF, Inoue I, Li X. Estrogen promotes Leydig cell engulfment by macrophages in male infertility. *The Journal of clinical investigation*. 2014; 124:2709–2721.
  89. Caberoy NB, Maiguel D, Kim Y, Li W. Identification of *tubby* and *tubby-like protein 1* as eat-me signals by phage display. *Experimental cell research*. 2010; 316:245–257.
  90. Caberoy NB, Zhou Y, Li W. *Tubby* and *tubby-like protein 1* are new MerTK ligands for phagocytosis. *The EMBO journal*. 2010; 29:3898–3910.
  91. Bosurgi L, Bernink JH, Delgado Cuevas V, Gagliani N, Joannas L, Schmid ET, Booth CJ, Ghosh S, Rothlin CV. Paradoxical role of the proto-oncogene *Axl* and Mer receptor tyrosine kinases in colon cancer. *Proceedings of the National Academy of Sciences of the United States of America*. 2013; 110:13091–13096.
  92. Loges S, Schmidt T, Tjwa M, van Geyte K, Lievens D, Lutgens E, Vanhoutte D, Borgel D, Plaisance S, Hoylaerts M, Lutun A, Dewerchin M, Jonckx B,

- Carmeliet P. Malignant cells fuel tumor growth by educating infiltrating leukocytes to produce the mitogen Gas6. *Blood*. 2010; 115:2264–2273.
93. Lee CH, Liu SY, Chou KC, Yeh CT, Shiah SG, Huang RY, Cheng JC, Yen CY, Shieh YS. Tumor-associated macrophages promote oral cancer progression through activation of the Axl signaling pathway. *Annals of surgical oncology*. 2014; 21:1031–1037.
  94. Anam K, Davis TA. Comparative analysis of gene transcripts for cell signaling receptors in bone marrow-derived hematopoietic stem/progenitor cell and mesenchymal stromal cell populations. *Stem cell research & therapy*. 2013; 4:112.
  95. Hutchison MR, Bassett MH, White PC. SCF, BDNF, and Gas6 are regulators of growth plate chondrocyte proliferation and differentiation. *Molecular endocrinology (Baltimore, Md)*. 2010; 24:193–203.
  96. Han J, Tian R, Yong B, Luo C, Tan P, Shen J, Peng T. Gas6/Axl mediates tumor cell apoptosis, migration and invasion and predicts the clinical outcome of osteosarcoma patients. *Biochemical and biophysical research communications*. 2013; 435:493–500.
  97. Zhang Y, Tang YJ, Man Y, Pan F, Li ZH, Jia LS. Knock-down of AXL receptor tyrosine kinase in osteosarcoma cells leads to decreased proliferation and increased apoptosis. *International journal of immunopathology and pharmacology*. 2013; 26:179–188.
  98. Rettew AN, Getty PJ, Greenfield EM. Receptor tyrosine kinases in osteosarcoma: not just the usual suspects. *Advances in experimental medicine and biology*. 2014; 804:47–66.
  99. Nakano T, Tani M, Ishibashi Y, Kimura K, Park YB, Imaizumi N, Tsuda H, Aoyagi K, Sasaki H, Ohwada S, Yokota J. Biological properties and gene expression associated with metastatic potential of human osteosarcoma. *Clinical & experimental metastasis*. 2003; 20:665–674.
  100. Shiozawa Y, Pedersen EA, Patel LR, Ziegler AM, Havens AM, Jung Y, Wang J, Zalucha S, Loberg RD, Pienta KJ, Taichman RS. GAS6/AXL axis regulates prostate cancer invasion, proliferation, and survival in the bone marrow niche. *Neoplasia (New York, NY)*. 2010; 12:116–127.
  101. Jacob AN, Kalapurakal J, Davidson WR, Kandpal G, Dunson N, Prashar Y, Kandpal RP. A receptor tyrosine kinase, UFO/Axl, and other genes isolated by a modified differential display PCR are overexpressed in metastatic prostatic carcinoma cell line DU145. *Cancer detection and prevention*. 1999; 23:325–332.
  102. Pacez JD, Vasques GJ, Correa RG, Vasconcellos JF, Duncan K, Gu X, Bhasin M, Libermann TA, Zerbini LF. The receptor tyrosine kinase Axl is an essential regulator of prostate cancer proliferation and tumor growth and represents a new therapeutic target. *Oncogene*. 2013; 32:689–698.
  103. Sainaghi PP, Castello L, Bergamasco L, Galletti M, Bellosta P, Avanzi GC. Gas6 induces proliferation in prostate carcinoma cell lines expressing the Axl receptor. *Journal of cellular physiology*. 2005; 204:36–44.
  104. Taichman RS, Patel LR, Bedenis R, Wang J, Weidner S, Schumann T, Yumoto K, Berry JE, Shiozawa Y, Pienta KJ. GAS6 receptor status is associated with dormancy and bone metastatic tumor formation. *PloS one*. 2013; 8:e61873.
  105. Jansen FH, van Rijswijk A, Teubel W, van Weerden WM, Reneman S, van den Bemd GJ, Roobol MJ, Bangma CH, Staal FJ, Jenster G. Profiling of antibody production against xenograft-released proteins by protein microarrays discovers prostate cancer markers. *Journal of proteome research*. 2012; 11:728–735.
  106. Nimmagadda S, Pullambhatla M, Lisok A, Hu C, Maitra A, Pomper MG. Imaging Axl expression in pancreatic and prostate cancer xenografts. *Biochemical and biophysical research communications*. 2014; 443:635–640.
  107. Healy AM, Schwartz JJ, Zhu X, Herrick BE, Varnum B, Farber HW. Gas 6 promotes Axl-mediated survival in pulmonary endothelial cells. *American journal of physiology Lung cellular and molecular physiology*. 2001; 280: L1273–1281.
  108. Gjerdrum C, Tiron C, Hoiby T, Stefansson I, Haugen H, Sandal T, Collett K, Li S, McCormack E, Gjertsen BT, Micklem DR, Akslen LA, Glackin C, Lorens JB. Axl is an essential epithelial-to-mesenchymal transition-induced regulator of breast cancer metastasis and patient survival. *Proceedings of the National Academy of Sciences of the United States of America*. 2010; 107:1124–1129.
  109. Berclaz G, Altermatt HJ, Rohrbach V, Kieffer I, Dreher E, Andres AC. Estrogen dependent expression of the receptor tyrosine kinase axl in normal and malignant human breast. *Annals of oncology: official journal of the European Society for Medical Oncology / ESMO*. 2001; 12: 819–824.
  110. Meric F, Lee WP, Sahin A, Zhang H, Kung HJ, Hung MC. Expression profile of tyrosine kinases in breast cancer. *Clinical cancer research: an official journal of the American Association for Cancer Research*. 2002; 8: 361–367.
  111. Zantek ND, Walker-Daniels J, Stewart J, Hansen RK, Robinson D, Miao H, Wang B, Kung HJ, Bissell MJ, Kinch MS. MCF-10A-NeoST: a new cell system for studying cell-ECM and cell-cell interactions in breast cancer. *Clinical cancer research: an official journal of the American Association for Cancer Research*. 2001; 7:3640–3648.
  112. Ren D, Li Y, Gong Y, Xu J, Miao X, Li X, Liu C, Jia L, Zhao Y. Phyllodes tumor of the breast: role of Axl and ST6GalNAcII in the development of mammary phyllodes tumors. *Tumour biology: the journal of the International Society for Oncodevelopmental Biology and Medicine*. 2014.
  113. D'Alfonso TM, Hannah J, Chen Z, Liu Y, Zhou P, Shin SJ. Axl receptor tyrosine kinase expression in breast cancer. *Journal of clinical pathology*. 2014.

114. Vuoriluoto K, Haugen H, Kiviluoto S, Mpindi JP, Nevo J, Gjerdrum C, Tiron C, Lorens JB, Ivaska J. Vimentin regulates EMT induction by Slug and oncogenic H-Ras and migration by governing Axl expression in breast cancer. *Oncogene*. 2011; 30:1436–1448.
115. Asiedu MK, Beauchamp-Perez FD, Ingle JN, Behrens MD, Radisky DC, Knutson KL. AXL induces epithelial-to-mesenchymal transition and regulates the function of breast cancer stem cells. *Oncogene*. 2014; 33:1316–1324.
116. Wang X, Saso H, Iwamoto T, Xia W, Gong Y, Pusztai L, Woodward WA, Reuben JM, Warner SL, Bearss DJ, Hortobagyi GN, Hung MC, Ueno NT. TIG1 promotes the development and progression of inflammatory breast cancer through activation of Axl kinase. *Cancer research*. 2013; 73:6516–6525.
117. Zhang YX, Knyazev PG, Cheburkin YV, Sharma K, Knyazev YP, Orfi L, Szabadkai I, Daub H, Keri G, Ullrich A. AXL is a potential target for therapeutic intervention in breast cancer progression. *Cancer research*. 2008; 68:1905–1915.
118. Liu L, Greger J, Shi H, Liu Y, Greshock J, Annan R, Halsey W, Sathe GM, Martin AM, Gilmer TM. Novel mechanism of lapatinib resistance in HER2-positive breast tumor cells: activation of AXL. *Cancer research*. 2009; 69:6871–6878.
119. Li Y, Ye X, Tan C, Hongo JA, Zha J, Liu J, Kallop D, Ludlam MJ, Pei L. Axl as a potential therapeutic target in cancer: role of Axl in tumor growth, metastasis and angiogenesis. *Oncogene*. 2009; 28:3442–3455.
120. Ahtaiainen L, Mirantes C, Jahnkola T, Escutenaire S, Diaconu I, Osterlund P, Kanerva A, Cerullo V, Hemminki A. Defects in innate immunity render breast cancer initiating cells permissive to oncolytic adenovirus. *PloS one*. 2010; 5: e13859.
121. Gujral TS, Karp RL, Finski A, Chan M, Schwartz PE, MacBeath G, Sorger P. Profiling phospho-signaling networks in breast cancer using reverse-phase protein arrays. *Oncogene*. 2013; 32:3470–3476.
122. Holland SJ, Pan A, Franci C, Hu Y, Chang B, Li W, Duan M, Torneros A, Yu J, Heckrodt TJ, Zhang J, Ding P, Apatira A, Chua J, Brandt R, Pine P, et al. R428, a selective small molecule inhibitor of Axl kinase, blocks tumor spread and prolongs survival in models of metastatic breast cancer. *Cancer research*. 2010; 70:1544–1554.
123. Shibata T, Habel DM, Coelho AL, Kunkel SL, Lukacs NW, Hogaboam CM. Axl receptor blockade ameliorates pulmonary pathology resulting from primary viral infection and viral exacerbation of asthma. *Journal of immunology (Baltimore, Md: 1950)*. 2014; 192: 3569–3581.
124. Shibata T, Ismailoglu UB, Kittan NA, Moreira AP, Coelho AL, Chupp GL, Kunkel SL, Lukacs NW, Hogaboam CM. Role of Gas6 in the development of fungal allergic airway disease in mice. *American journal of respiratory cell and molecular biology*. 2014.
125. Ou WB, Hubert C, Corson JM, Bueno R, Flynn DL, Sugarbaker DJ, Fletcher JA. Targeted inhibition of multiple receptor tyrosine kinases in mesothelioma. *Neoplasia (New York, NY)*. 2011; 13:12–22.
126. Ou WB, Corson JM, Flynn DL, Lu WP, Wise SC, Bueno R, Sugarbaker DJ, Fletcher JA. AXL regulates mesothelioma proliferation and invasiveness. *Oncogene*. 2011; 30:1643–1652.
127. Zhou S, Liu L, Li H, Eilers G, Kuang Y, Shi S, Yan Z, Li X, Corson JM, Meng F, Zhou H, Sheng Q, Fletcher JA, Ou WB. Multipoint targeting of the PI3K/mTOR pathway in mesothelioma. *British journal of cancer*. 2014; 110:2479–2488.
128. Pinato DJ, Mauri FA, Lloyd T, Vaira V, Casadio C, Boldorini RL, Sharma R. The expression of Axl receptor tyrosine kinase influences the tumour phenotype and clinical outcome of patients with malignant pleural mesothelioma. *British journal of cancer*. 2013; 108:621–628.
129. Cui ZL, Han FF, Peng XH, Chen X, Luan CY, Han RC, Xu WG, Guo XJ. YES-associated protein 1 promotes adenocarcinoma growth and metastasis through activation of the receptor tyrosine kinase Axl. *International journal of immunopathology and pharmacology*. 2012; 25: 989–1001.
130. Iida S, Miki Y, Suzuki T, Mori K, Saito M, Niikawa H, Kondo T, Yamada-Okabe H, Sasano H. Activation of AXL and antitumor effects of a monoclonal antibody to AXL in lung adenocarcinoma. *Anticancer research*. 2014; 34:1821–1827.
131. Ishikawa M, Sonobe M, Nakayama E, Kobayashi M, Kikuchi R, Kitamura J, Imamura N, Date H. Higher expression of receptor tyrosine kinase Axl, and differential expression of its ligand, Gas6, predict poor survival in lung adenocarcinoma patients. *Annals of surgical oncology*. 2013; 20:S467–476.
132. Shieh YS, Lai CY, Kao YR, Shiah SG, Chu YW, Lee HS, Wu CW. Expression of axl in lung adenocarcinoma and correlation with tumor progression. *Neoplasia (New York, NY)*. 2005; 7:1058–1064.
133. Li D, Liu S, Liu R, Park R, Yu H, Krasnoperov V, Gill PS, Li Z, Shan H, Conti PS. Axl-Targeted Cancer Imaging with Humanized Antibody h173. *Molecular imaging and biology: MIB: the official publication of the Academy of Molecular Imaging*. 2014.
134. Vaughan CA, Frum R, Pearsall I, Singh S, Windle B, Yeudall A, Deb SP, Deb S. Allele specific gain-of-function activity of p53 mutants in lung cancer cells. *Biochemical and biophysical research communications*. 2012; 428:6–10.
135. Seo JS, Ju YS, Lee WC, Shin JY, Lee JK, Bleazard T, Lee J, Jung YJ, Kim JO, Shin JY, Yu SB, Kim J, Lee ER, Kang CH, Park IK, Rhee H, et al. The transcriptional

- landscape and mutational profile of lung adenocarcinoma. *Genome research*. 2012; 22:2109–2119.
136. Yu DP, Dong YJ, Zhang HQ, Wang JH, Qu Y, Zhou LJ, Su D, Zhang LL, Zhao D, Cai YR. Differential expression of and genes in lung adenocarcinoma subtypes according to the epidermal growth factor receptor and anaplastic lymphoma kinase gene status. *Biomedical reports*. 2014; 2:481–489.
  137. Huang JS, Cho CY, Hong CC, Yan MD, Hsieh MC, Lay JD, Lai GM, Cheng AL, Chuang SE. Oxidative stress enhances Axl-mediated cell migration through an Akt1/Rac1-dependent mechanism. *Free radical biology & medicine*. 2013; 65:1246–1256.
  138. Lay JD, Hong CC, Huang JS, Yang YY, Pao CY, Liu CH, Lai YP, Lai GM, Cheng AL, Su IJ, Chuang SE. Sulfasalazine suppresses drug resistance and invasiveness of lung adenocarcinoma cells expressing AXL. *Cancer research*. 2007; 67:3878–3887.
  139. Santarpia M, Altavilla G, Salazar MF, Magri I, Pettineo G, Benecchi S, Rosell R. Tyrosine kinase inhibitors for non-small-cell lung cancer: finding patients who will be responsive. *Expert review of respiratory medicine*. 2011; 5:413–424.
  140. Zhang Z, Lee JC, Lin L, Olivas V, Au V, LaFramboise T, Abdel-Rahman M, Wang X, Levine AD, Rho JK, Choi YJ, Choi CM, Kim SW, Jang SJ, Park YS, Kim WS, et al. Activation of the AXL kinase causes resistance to EGFR-targeted therapy in lung cancer. *Nature genetics*. 2012; 44:852–860.
  141. Gusenbauer S, Vlaicu P, Ullrich A. HGF induces novel EGFR functions involved in resistance formation to tyrosine kinase inhibitors. *Oncogene*. 2013; 32:3846–3856.
  142. Kurokawa M, Ise N, Omi K, Goishi K, Higashiyama S. Cisplatin influences acquisition of resistance to molecular-targeted agents through epithelial-mesenchymal transition-like changes. *Cancer science*. 2013; 104:904–911.
  143. Kim HR, Kim WS, Choi YJ, Choi CM, Rho JK, Lee JC. Epithelial-mesenchymal transition leads to crizotinib resistance in H2228 lung cancer cells with EML4-ALK translocation. *Molecular oncology*. 2013; 7:1093–1102.
  144. Wang J, Pursell NW, Samson ME, Atoyan R, Ma AW, Selmi A, Xu W, Cai X, Voi M, Savagner P, Lai CJ. Potential advantages of CUDC-101, a multitargeted HDAC, EGFR, and HER2 inhibitor, in treating drug resistance and preventing cancer cell migration and invasion. *Molecular cancer therapeutics*. 2013; 12:925–936.
  145. Yoshida T, Zhang G, Smith MA, Lopez AS, Bai Y, Li J, Fang B, Koomen JM, Rawal B, Fisher KJ, Chen YA, Kitano M, Morita Y, Yamaguchi H, Shibata K, Okabe T, et al. Tyrosine phosphoproteomics identified both co-drivers and co-targeting strategies for T790M-related EGFR-TKI resistance in non-small cell lung cancer. *Clinical cancer research: an official journal of the American Association for Cancer Research*. 2014.
  146. Byers LA, Diao L, Wang J, Saintigny P, Girard L, Peyton M, Shen L, Fan Y, Giri U, Tumula PK, Nilsson MB, Gudikote J, Tran H, Cardnell RJ, Bearss DJ, Warner SL, et al. An epithelial-mesenchymal transition gene signature predicts resistance to EGFR and PI3K inhibitors and identifies Axl as a therapeutic target for overcoming EGFR inhibitor resistance. *Clinical cancer research: an official journal of the American Association for Cancer Research*. 2013; 19:279–290.
  147. Wang Y, Xia H, Zhuang Z, Miao L, Chen X, Cai H. Axl-altered microRNAs regulate tumorigenicity and gefitinib resistance in lung cancer. *Cell death & disease*. 2014; 5:e1227.
  148. Suda K, Mizuuchi H, Sato K, Takemoto T, Iwasaki T, Mitsudomi T. The insulin-like growth factor 1 receptor causes acquired resistance to erlotinib in lung cancer cells with the wild-type epidermal growth factor receptor. *International journal of cancer Journal international du cancer*. 2014; 135:1002–1006.
  149. Linger RM, Cohen RA, Cummings CT, Sather S, Migdall-Wilson J, Middleton DH, Lu X, Baron AE, Franklin WA, Merrick DT, Jedlicka P, DeRyckere D, Heasley LE, Graham DK. Mer or Axl receptor tyrosine kinase inhibition promotes apoptosis, blocks growth and enhances chemosensitivity of human non-small cell lung cancer. *Oncogene*. 2013; 32:3420–3431.
  150. Postel-Vinay S, Ashworth A. AXL and acquired resistance to EGFR inhibitors. *Nature genetics*. 2012; 44:835–836.
  151. Tang H, Yang J, Shen DR, Calambur D, Witmer M, Wu S, Carpenter B, Zhang Y, Gao M, Constantine K, Zhang L, Cvijic ME. High-throughput high-content imaging assays for identification and characterization of selective AXL pathway inhibitors. *Assay and drug development technologies*. 2014; 12:80–86.
  152. Patel D, Shukla S, Gupta S. Apigenin and cancer chemoprevention: progress, potential and promise (review). *International journal of oncology*. 2007; 30:233–245.
  153. Kim KC, Choi EH, Lee C. Axl receptor tyrosine kinase is a novel target of apigenin for the inhibition of cell proliferation. *International journal of molecular medicine*. 2014; 34:592–598.
  154. Kim KC, Lee C. Reversal of Cisplatin resistance by epigallocatechin gallate is mediated by downregulation of axl and tyro 3 expression in human lung cancer cells. *The Korean journal of physiology & pharmacology: official journal of the Korean Physiological Society and the Korean Society of Pharmacology*. 2014; 18:61–66.
  155. Rho JK, Choi YJ, Kim SY, Kim TW, Choi EK, Yoon SJ, Park BM, Park E, Bae JH, Choi CM, Lee JC. MET and AXL inhibitor NPS-1034 exerts efficacy against lung cancer cells resistant to EGFR kinase inhibitors because of MET or AXL activation. *Cancer research*. 2014; 74:253–262.
  156. Esposito CL, Cerchia L, Catuogno S, De Vita G, Dassi JP, Santamaria G, Swiderski P, Condorelli G, Giangrande PH,

- de Franciscis V. Multifunctional Aptamer-miRNA Conjugates for Targeted Cancer Therapy. *Molecular therapy: the journal of the American Society of Gene Therapy*. 2014; 22:1151–1163.
157. Melaragno MG, Fridell YW, Berk BC. The Gas6/Axl system: a novel regulator of vascular cell function. *Trends in cardiovascular medicine*. 1999; 9:250–253.
  158. Hutterer M, Knyazev P, Abate A, Reschke M, Maier H, Stefanova N, Knyazeva T, Barbieri V, Reindl M, Muigg A, Kostron H, Stockhammer G, Ullrich A. Axl and growth arrest-specific gene 6 are frequently overexpressed in human gliomas and predict poor prognosis in patients with glioblastoma multiforme. *Clinical cancer research: an official journal of the American Association for Cancer Research*. 2008; 14:130–138.
  159. Korshunov VA, Mohan AM, Georger MA, Berk BC. Axl, a receptor tyrosine kinase, mediates flow-induced vascular remodeling. *Circulation research*. 2006; 98:1446–1452.
  160. Goodman WG, London G, Amann K, Block GA, Giachelli C, Hruska KA, Ketteler M, Levin A, Massy Z, McCarron DA, Raggi P, Shanahan CM, Yorioka N. Vascular calcification in chronic kidney disease. *American journal of kidney diseases: the official journal of the National Kidney Foundation*. 2004; 43:572–579.
  161. Son BK, Kozaki K, Iijima K, Eto M, Kojima T, Ota H, Senda Y, Maemura K, Nakano T, Akishita M, Ouchi Y. Statins protect human aortic smooth muscle cells from inorganic phosphate-induced calcification by restoring Gas6-Axl survival pathway. *Circulation research*. 2006; 98:1024–1031.
  162. Ciceri P, Elli F, Brenna I, Volpi E, Romagnoli S, Tosi D, Braidotti P, Brancaccio D, Cozzolino M. Lanthanum prevents high phosphate-induced vascular calcification by preserving vascular smooth muscle lineage markers. *Calcified tissue international*. 2013; 92:521–530.
  163. Son BK, Kozaki K, Iijima K, Eto M, Nakano T, Akishita M, Ouchi Y. Gas6/Axl-PI3K/Akt pathway plays a central role in the effect of statins on inorganic phosphate-induced calcification of vascular smooth muscle cells. *European journal of pharmacology*. 2007; 556:1–8.
  164. Hasanbasic I, Cuerquis J, Varnum B, Blostein MD. Intracellular signaling pathways involved in Gas6-Axl-mediated survival of endothelial cells. *American journal of physiology Heart and circulatory physiology*. 2004; 287:H1207–1213.
  165. D'Arcangelo D, Gaetano C, Capogrossi MC. Acidification prevents endothelial cell apoptosis by Axl activation. *Circulation research*. 2002; 91:e4–12.
  166. Angelillo-Scherrer A, Burnier L, Flores N, Savi P, DeMol M, Schaeffer P, Herbert JM, Lemke G, Goff SP, Matsushima GK, Earp HS, Vesin C, Hoylaerts MF, Plaisance S, Collen D, Conway EM, et al. Role of Gas6 receptors in platelet signaling during thrombus stabilization and implications for antithrombotic therapy. *The Journal of clinical investigation*. 2005; 115:237–246.
  167. Saller F, Burnier L, Schapira M, Angelillo-Scherrer A. Role of the growth arrest-specific gene 6 (gas6) product in thrombus stabilization. *Blood cells, molecules & diseases*. 2006; 36:373–378.
  168. Cosemans JM, Van Kruchten R, Olieslagers S, Schurgers LJ, Verheyen FK, Munnix IC, Waltenberger J, Angelillo-Scherrer A, Hoylaerts MF, Carmeliet P, Heemskerk JW. Potentiating role of Gas6 and Tyro3, Axl and Mer (TAM) receptors in human and murine platelet activation and thrombus stabilization. *Journal of thrombosis and haemostasis: JTH*. 2010; 8:1797–1808.
  169. Collett GD, Sage AP, Kirton JP, Alexander MY, Gilmore AP, Canfield AE. Axl/phosphatidylinositol 3-kinase signaling inhibits mineral deposition by vascular smooth muscle cells. *Circulation research*. 2007; 100:502–509.
  170. Lee CH, Shieh YS, Tsai CS, Hung YJ, Tsai YT, Lin CY. Expression of growth arrest-specific protein 6 and Axl molecules in the left internal mammary artery of patients undergoing coronary artery bypass grafting. *Journal of clinical pathology*. 2014; 67:506–511.
  171. Hurtado B, Munoz X, Recarte-Pelz P, Garcia N, Luque A, Krupinski J, Sala N, Garcia de Frutos P. Expression of the vitamin K-dependent proteins GAS6 and protein S and the TAM receptor tyrosine kinases in human atherosclerotic carotid plaques. *Thrombosis and haemostasis*. 2011; 105:873–882.
  172. Lee CH, Shieh YS, Tsai CS, Hung YJ, Tsai YT, Lin CY. Plasma concentrations predict aortic expression of growth-arrest-specific protein 6 in patients undergoing coronary artery bypass grafting. *PloS one*. 2013; 8:e79452.
  173. Batlle M, Recarte-Pelz P, Roig E, Castel MA, Cardona M, Farrero M, Ortiz JT, Campos B, Pulgarin MJ, Ramirez J, Perez-Villa F, Garcia de Frutos P. AXL receptor tyrosine kinase is increased in patients with heart failure. *International journal of cardiology*. 2014; 173:402–409.
  174. Stenhoff J, Dahlback B, Hafizi S. Vitamin K-dependent Gas6 activates ERK kinase and stimulates growth of cardiac fibroblasts. *Biochemical and biophysical research communications*. 2004; 319:871–878.
  175. Melaragno MG, Wuthrich DA, Poppa V, Gill D, Lindner V, Berk BC, Corson MA. Increased expression of Axl tyrosine kinase after vascular injury and regulation by G protein-coupled receptor agonists in rats. *Circulation research*. 1998; 83:697–704.
  176. Ishida M, Berk BC. Angiotensin II signal transduction in vascular smooth muscle cells: role of tyrosine kinases. *The Keio journal of medicine*. 1997; 46:61–68.
  177. Melaragno MG, Cavet ME, Yan C, Tai LK, Jin ZG, Haendeler J, Berk BC. Gas6 inhibits apoptosis in

- vascular smooth muscle: role of Axl kinase and Akt. *Journal of molecular and cellular cardiology*. 2004; 37: 881–887.
178. Gerloff J, Korshunov VA. Immune modulation of vascular resident cells by Axl orchestrates carotid intima-media thickening. *The American journal of pathology*. 2012; 180:2134–2143.
  179. Cavet ME, Smolock EM, Menon P, Konishi A, Korshunov VA, Berk BC. Gas6-Axl pathway: the role of redox-dependent association of Axl with nonmuscle myosin IIB. *Hypertension*. 2010; 56:105–111.
  180. Smolock EM, Korshunov VA. Pharmacological inhibition of Axl affects smooth muscle cell functions under oxidative stress. *Vascular pharmacology*. 2010; 53: 185–192.
  181. Korshunov VA, Daul M, Massett MP, Berk BC. Axl mediates vascular remodeling induced by deoxycorticosterone acetate-salt hypertension. *Hypertension*. 2007; 50: 1057–1062.
  182. Batchu SN, Hughson A, Gerloff J, Fowell DJ, Korshunov VA. Role of Axl in early kidney inflammation and progression of salt-dependent hypertension. *Hypertension*. 2013; 62:302–309.
  183. Liu X, Gong Y, Jia J, Bai Y, Gui S, Wang T, Zhou R. Plasma concentrations of sAxl are associated with severe preeclampsia. *Clinical biochemistry*. 2014; 47:173–176.
  184. Paneni F, Beckman JA, Creager MA, Cosentino F. Diabetes and vascular disease: pathophysiology, clinical consequences, and medical therapy: part I. *European heart journal*. 2013; 34:2436–2443.
  185. Cavet ME, Smolock EM, Ozturk OH, World C, Pang J, Konishi A, Berk BC. Gas6-axl receptor signaling is regulated by glucose in vascular smooth muscle cells. *Arteriosclerosis, thrombosis, and vascular biology*. 2008; 28:886–891.
  186. Lee CH, Shieh YS, Hsiao FC, Kuo FC, Lin CY, Hsieh CH, Hung YJ. High glucose induces human endothelial dysfunction through an Axl-dependent mechanism. *Cardiovascular diabetology*. 2014; 13:53.
  187. O'Donnell K, Harkes IC, Dougherty L, Wicks IP. Expression of receptor tyrosine kinase Axl and its ligand Gas6 in rheumatoid arthritis: evidence for a novel endothelial cell survival pathway. *The American journal of pathology*. 1999; 154:1171–1180.
  188. Gallicchio M, Mitola S, Valdembri D, Fantozzi R, Varnum B, Avanzi GC, Bussolino F. Inhibition of vascular endothelial growth factor receptor 2-mediated endothelial cell activation by Axl tyrosine kinase receptor. *Blood*. 2005; 105:1970–1976.
  189. Ye X, Li Y, Stawicki S, Couto S, Eastham-Anderson J, Kallop D, Weimer R, Wu Y, Pei L. An anti-Axl monoclonal antibody attenuates xenograft tumor growth and enhances the effect of multiple anticancer therapies. *Oncogene*. 2010; 29:5254–5264.
  190. Fridell YW, Villa J, Jr., Attar EC, Liu ET. GAS6 induces Axl-mediated chemotaxis of vascular smooth muscle cells. *The Journal of biological chemistry*. 1998; 273:7123–7126.
  191. Yanagita M, Arai H, Ishii K, Nakano T, Ohashi K, Mizuno K, Varnum B, Fukatsu A, Doi T, Kita T. Gas6 regulates mesangial cell proliferation through Axl in experimental glomerulonephritis. *The American journal of pathology*. 2001; 158:1423–1432.
  192. Yin JL, Hambly BD, Bao SS, Painter D, Bishop GA, Eris JM. Expression of growth arrest-specific gene 6 and its receptors in dysfunctional human renal allografts. *Transplant international: official journal of the European Society for Organ Transplantation*. 2003; 16:681–688.
  193. Guo JK, Marlier A, Shi H, Shan A, Ardito TA, Du ZP, Kashgarian M, Krause DS, Biemesderfer D, Cantley LG. Increased tubular proliferation as an adaptive response to glomerular albuminuria. *Journal of the American Society of Nephrology: JASN*. 2012; 23:429–437.
  194. Eng PC, Chua WC, Suk Peng Chew V, Wong PT, Yin JL, Hambly B, McLachlan CS. Chronic angiotensin-converting enzyme inhibition up-regulates mouse kidney growth arrest specific-6 protein and the AXL subfamily of receptor tyrosine kinases. *Journal of the renin-angiotensin-aldosterone system: JRAAS*. 2008; 9:238–241.
  195. Fiebeler A, Park JK, Muller DN, Lindschau C, Mengel M, Merkel S, Banas B, Luft FC, Haller H. Growth arrest specific protein 6/Axl signaling in human inflammatory renal diseases. *American journal of kidney diseases: the official journal of the National Kidney Foundation*. 2004; 43:286–295.
  196. Chung BI, Malkowicz SB, Nguyen TB, Libertino JA, McGarvey TW. Expression of the proto-oncogene Axl in renal cell carcinoma. *DNA and cell biology*. 2003; 22:533–540.
  197. Dalgin GS, Holloway DT, Liou LS, DeLisi C. Identification and characterization of renal cell carcinoma gene markers. *Cancer informatics*. 2007; 3:65–92.
  198. Gustafsson A, Martuszezowska D, Johansson M, Ekman C, Hafizi S, Ljungberg B, Dahlback B. Differential expression of Axl and Gas6 in renal cell carcinoma reflecting tumor advancement and survival. *Clinical cancer research: an official journal of the American Association for Cancer Research*. 2009; 15:4742–4749.
  199. Cohen HT, McGovern FJ. Renal-cell carcinoma. *The New England journal of medicine*. 2005; 353: 2477–2490.
  200. Boysen G, Bausch-Fluck D, Thoma CR, Nowicka AM, Stiehl DP, Cima I, Luu VD, von Teichman A, Hermanns T, Sulser T, Ingold-Heppner B, Fankhauser N, Wenger RH, Krek W, Schraml P, Wollscheid B, et al. Identification and functional characterization of pVHL-dependent cell surface proteins in renal cell carcinoma. *Neoplasia (New York, NY)*. 2012; 14:535–546.

201. Maquoi E, Voros G, Carmeliet P, Collen D, Lijnen HR. Role of Gas-6 in adipogenesis and nutritionally induced adipose tissue development in mice. *Arteriosclerosis, thrombosis, and vascular biology*. 2005; 25:1002–1007.
202. Suzuki S, Sembon S, Iwamoto M, Fuchimoto D, Onishi A. Identification of genes downregulated during differentiation of porcine mesenteric adipocytes. *Journal of animal science*. 2008; 86:3367–3376.
203. Lijnen HR, Christiaens V, Scroyen L. Growth arrest-specific protein 6 receptor antagonism impairs adipocyte differentiation and adipose tissue development in mice. *The Journal of pharmacology and experimental therapeutics*. 2011; 337:457–464.
204. Scroyen I, Frederix L, Lijnen HR. Axl deficiency does not affect adipogenesis or adipose tissue development. *Obesity (Silver Spring, Md)*. 2012; 20:1168–1173.
205. Hsiao FC, Lin YF, Hsieh PS, Chu NF, Shieh YS, Hsieh CH, Lee CH, Hung YJ. Circulating growth arrest-specific 6 protein is associated with adiposity, systemic inflammation, and insulin resistance among overweight and obese adolescents. *The Journal of clinical endocrinology and metabolism*. 2013; 98:E267–274.
206. Peng T, Zhang P, Liu J, Nguyen T, Bolshakov S, Belousov R, Young ED, Wang X, Brewer K, Lopez-Terrada DH, Oliveira AM, Lazar AJ, Lev D. An experimental model for the study of well-differentiated and dedifferentiated liposarcoma; deregulation of targetable tyrosine kinase receptors. *Laboratory investigation; a journal of technical methods and pathology*. 2011; 91:392–403.
207. Hoffman A, Ghadimi MP, Demicco EG, Creighton CJ, Torres K, Colombo C, Peng T, Lusby K, Ingram D, Hornick JL, Wang WL, Ravi V, Lazar AJ, Lev D, Pollock RE. Localized and metastatic myxoid/round cell liposarcoma: clinical and molecular observations. *Cancer*. 2013; 119:1868–1877.
208. Quong RY, Bickford ST, Ing YL, Terman B, Herlyn M, Lassam NJ. Protein kinases in normal and transformed melanocytes. *Melanoma research*. 1994; 4:313–319.
209. Green J, Ikram M, Vyas J, Patel N, Proby CM, Ghali L, Leigh IM, O'Toole EA, Storey A. Overexpression of the Axl tyrosine kinase receptor in cutaneous SCC-derived cell lines and tumours. *British journal of cancer*. 2006; 94:1446–1451.
210. Fedorenko IV, Fang B, Koomen JM, Gibney GT, Smalley KS. Amuvatinib has cytotoxic effects against NRAS-mutant melanoma but not BRAF-mutant melanoma. *Melanoma research*. 2014.
211. Aplin AE. Axl of evil? *The Journal of investigative dermatology*. 2011; 131:2343–2345.
212. Kim JE, Leung E, Baguley BC, Finlay GJ. Heterogeneity of expression of epithelial-mesenchymal transition markers in melanocytes and melanoma cell lines. *Frontiers in genetics*. 2013; 4:97.
213. Sensi M, Catani M, Castellano G, Nicolini G, Alciato F, Tragni G, De Santis G, Bersani I, Avanzi G, Tomassetti A, Canevari S, Anichini A. Human cutaneous melanomas lacking MITF and melanocyte differentiation antigens express a functional Axl receptor kinase. *The Journal of investigative dermatology*. 2011; 131:2448–2457.
214. Tworkoski K, Singhal G, Szpakowski S, Zito CI, Bacchiocchi A, Muthusamy V, Bosenberg M, Krauthammer M, Halaban R, Stern DF. Phosphoproteomic screen identifies potential therapeutic targets in melanoma. *Molecular cancer research: MCR*. 2011; 9: 801–812.
215. Tworkoski KA, Platt JT, Bacchiocchi A, Bosenberg M, Boggon TJ, Stern DF. MERTK controls melanoma cell migration and survival and differentially regulates cell behavior relative to AXL. *Pigment cell & melanoma research*. 2013; 26:527–541.
216. Ohanna M, Cheli Y, Bonet C, Bonazzi VF, Allegra M, Giuliano S, Bille K, Bahadoran P, Giacchero D, Lacour JP, Boyle GM, Hayward NF, Bertolotto C, Ballotti R. Secretome from senescent melanoma engages the STAT3 pathway to favor reprogramming of naive melanoma towards a tumor-initiating cell phenotype. *Oncotarget*. 2013; 4:2212–2224.
217. Konieczkowski DJ, Johannessen CM, Abudayyeh O, Kim JW, Cooper ZA, Piris A, Frederick DT, Barzily-Rokni M, Straussman R, Haq R, Fisher DE, Mesirov JP, Hahn WC, Flaherty KT, Wargo JA, Tamayo P, et al. A Melanoma Cell State Distinction Influences Sensitivity to MAPK Pathway Inhibitors. *Cancer discovery*. 2014.
218. Commandeur S, de Gruijl FR, Willemze R, Tensen CP, El Ghalbzouri A. An in vitro three-dimensional model of primary human cutaneous squamous cell carcinoma. *Experimental dermatology*. 2009; 18:849–856.
219. Lee CH, Yen CY, Liu SY, Chen CK, Chiang CF, Shiah SG, Chen PH, Shieh YS. Axl is a prognostic marker in oral squamous cell carcinoma. *Annals of surgical oncology*. 2012; 19:S500–508.
220. Papadakis ES, Cichon MA, Vyas JJ, Patel N, Ghali L, Cerio R, Storey A, O'Toole EA. Axl promotes cutaneous squamous cell carcinoma survival through negative regulation of pro-apoptotic Bcl-2 family members. *The Journal of investigative dermatology*. 2011; 131: 509–517.
221. Li R, Chen J, Hammonds G, Phillips H, Armanini M, Wood P, Bunge R, Godowski PJ, Sliwkowski MX, Mather JP. Identification of Gas6 as a growth factor for human Schwann cells. *The Journal of neuroscience: the official journal of the Society for Neuroscience*. 1996; 16:2012–2019.
222. Prieto AL, Weber JL, Tracy S, Heeb MJ, Lai C. Gas6, a ligand for the receptor protein-tyrosine kinase Tyro-3, is widely expressed in the central nervous system. *Brain research*. 1999; 816:646–661.

223. Pierce AM, Keating AK. TAM receptor tyrosine kinases: expression, disease and oncogenesis in the central nervous system. *Brain research*. 2014; 1542:206–220.
224. Ji R, Tian S, Lu HJ, Lu Q, Zheng Y, Wang X, Ding J, Li Q, Lu Q. TAM receptors affect adult brain neurogenesis by negative regulation of microglial cell activation. *Journal of immunology (Baltimore, Md: 1950)*. 2013; 191:6165–6177.
225. Prieto AL, Weber JL, Lai C. Expression of the receptor protein-tyrosine kinases Tyro-3, Axl, and mer in the developing rat central nervous system. *The Journal of comparative neurology*. 2000; 425:295–314.
226. Allen MP, Xu M, Zeng C, Tobet SA, Wierman ME. Myocyte enhancer factors-2B and -2C are required for adhesion related kinase repression of neuronal gonadotropin releasing hormone gene expression. *The Journal of biological chemistry*. 2000; 275:39662–39670.
227. Pierce A, Xu M, Bliesner B, Liu Z, Richards J, Tobet S, Wierman ME. Hypothalamic but not pituitary or ovarian defects underlie the reproductive abnormalities in Axl/Tyro3 null mice. *Molecular and cellular endocrinology*. 2011; 339:151–158.
228. Allen MP, Zeng C, Schneider K, Xiong X, Meintzer MK, Bellosta P, Basilico C, Varnum B, Heidenreich KA, Wierman ME. Growth arrest-specific gene 6 (Gas6)/adhesion related kinase (Ark) signaling promotes gonadotropin-releasing hormone neuronal survival via extracellular signal-regulated kinase (ERK) and Akt. *Molecular endocrinology (Baltimore, Md)*. 1999; 13:191–201.
229. Wang Q, Lu QJ, Xiao B, Zheng Y, Wang XM. Expressions of Axl and Tyro-3 receptors are under regulation of nerve growth factor and are involved in differentiation of PC12 cells. *Neuroscience bulletin*. 2011; 27:15–22.
230. Keating AK, Kim GK, Jones AE, Donson AM, Ware K, Mulcahy JM, Salzberg DB, Foreman NK, Liang X, Thorburn A, Graham DK. Inhibition of Mer and Axl receptor tyrosine kinases in astrocytoma cells leads to increased apoptosis and improved chemosensitivity. *Molecular cancer therapeutics*. 2010; 9:1298–1307.
231. Grommes C, Lee CY, Wilkinson BL, Jiang Q, Koenigsnecht-Talboo JL, Varnum B, Landreth GE. Regulation of microglial phagocytosis and inflammatory gene expression by Gas6 acting on the Axl/Mer family of tyrosine kinases. *Journal of neuroimmune pharmacology: the official journal of the Society on NeuroImmune Pharmacology*. 2008; 3:130–140.
232. Weinger JG, Brosnan CF, Loudig O, Goldberg MF, Macian F, Arnett HA, Prieto AL, Tsiperson V, Shafit-Zagardo B. Loss of the receptor tyrosine kinase Axl leads to enhanced inflammation in the CNS and delayed removal of myelin debris during experimental autoimmune encephalomyelitis. *Journal of neuroinflammation*. 2011; 8:49.
233. Hoehn HJ, Kress Y, Sohn A, Brosnan CF, Bourdon S, Shafit-Zagardo B. Axl<sup>-/-</sup> mice have delayed recovery and prolonged axonal damage following cuprizone toxicity. *Brain research*. 2008; 1240:1–11.
234. Wilhelm I, Nagyoszi P, Farkas AE, Couraud PO, Romero IA, Weksler B, Fazakas C, Dung NT, Bottka S, Bauer H, Bauer HC, Krizbai IA. Hyperosmotic stress induces Axl activation and cleavage in cerebral endothelial cells. *Journal of neurochemistry*. 2008; 107:116–126.
235. Shankar SL, O'Guin K, Cammer M, McMorris FA, Stitt TN, Basch RS, Varnum B, Shafit-Zagardo B. The growth arrest-specific gene product Gas6 promotes the survival of human oligodendrocytes via a phosphatidylinositol 3-kinase-dependent pathway. *The Journal of neuroscience: the official journal of the Society for Neuroscience*. 2003; 23:4208–4218.
236. Weinger JG, Gohari P, Yan Y, Backer JM, Varnum B, Shafit-Zagardo B. In brain, Axl recruits Grb2 and the p85 regulatory subunit of PI3 kinase; in vitro mutagenesis defines the requisite binding sites for downstream Akt activation. *Journal of neurochemistry*. 2008; 106:134–146.
237. Vajkoczy P, Knyazev P, Kunkel A, Capelle HH, Behrnt S, von Tengg-Kobligk H, Kiessling F, Eichelsbacher U, Essig M, Read TA, Erber R, Ullrich A. Dominant-negative inhibition of the Axl receptor tyrosine kinase suppresses brain tumor cell growth and invasion and prolongs survival. *Proceedings of the National Academy of Sciences of the United States of America*. 2006; 103:5799–5804.
238. Staffin K, Zuchner T, Honeth G, Darabi A, Lundberg C. Identification of proteins involved in neural progenitor cell targeting of gliomas. *BMC cancer*. 2009; 9:206.
239. Nakada M, Kita D, Teng L, Pyko IV, Watanabe T, Hayashi Y, Hamada J. Receptor tyrosine kinases: principles and functions in glioma invasion. *Advances in experimental medicine and biology*. 2013; 986:143–170.
240. Wang J, Zhang H, Young AG, Qiu R, Argalian S, Li X, Wu X, Lemke G, Lu Q. Transcriptome analysis of neural progenitor cells by a genetic dual reporter strategy. *Stem cells (Dayton, Ohio)*. 2011; 29:1589–1600.
241. Ott M, Litzenburger UM, Sahn F, Rauschenbach KJ, Tudoran R, Hartmann C, Marquez VE, von Deimling A, Wick W, Platten M. Promotion of glioblastoma cell motility by enhancer of zeste homolog 2 (EZH2) is mediated by AXL receptor kinase. *PloS one*. 2012; 7:e47663.
242. Allison AC. The possible role of vitamin K deficiency in the pathogenesis of Alzheimer's disease and in augmenting brain damage associated with cardiovascular disease. *Medical hypotheses*. 2001; 57:151–155.
243. Mattsson N, Insel P, Nosheny R, Zetterberg H, Trojanowski JQ, Shaw LM, Tosun D, Weiner M. CSF protein biomarkers predicting longitudinal reduction of CSF beta-amyloid42 in cognitively healthy elders. *Translational psychiatry*. 2013; 3:e293.



244. Kiddle SJ, Thambisetty M, Simmons A, Riddoch-Contreras J, Hye A, Westman E, Pike I, Ward M, Johnston C, Lupton MK, Lunnon K, Soininen H, Kloszewska I, Tsolaki M, Vellas B, Mecocci P, et al. Plasma based markers of [<sup>11</sup>C] PiB-PET brain amyloid burden. *PLoS one*. 2012; 7:e44260.
245. Valverde P, Obin MS, Taylor A. Role of Gas6/Axl signaling in lens epithelial cell proliferation and survival. *Experimental eye research*. 2004; 78:27–37.
246. Geatrell JC, Gan PM, Mansergh FC, Kisiswa L, Jarrin M, Williams LA, Evans MJ, Boulton ME, Wride MA. Apoptosis gene profiling reveals spatio-temporal regulated expression of the p53/Mdm2 pathway during lens development. *Experimental eye research*. 2009; 88:1137–1151.
247. Lindqvist N, Lonngren U, Agudo M, Napankangas U, Vidal-Sanz M, Hallbook F. Multiple receptor tyrosine kinases are expressed in adult rat retinal ganglion cells as revealed by single-cell degenerate primer polymerase chain reaction. *Upsala journal of medical sciences*. 2010; 115:65–80.
248. Kokkinaki M, Abu-Asab M, Gunawardena N, Ahern G, Javidnia M, Young J, Golestaneh N. Klotho regulates retinal pigment epithelial functions and protects against oxidative stress. *The Journal of neuroscience: the official journal of the Society for Neuroscience*. 2013; 33:16346–16359.
249. Sheets NL, Chauhan BK, Wawrousek E, Hejtmancik JF, Cvekl A, Kantorow M. Cataract- and lens-specific upregulation of ARK receptor tyrosine kinase in Emory mouse cataract. *Investigative ophthalmology & visual science*. 2002; 43:1870–1875.
250. Goswami S, Sheets NL, Zavadi J, Chauhan BK, Bottinger EP, Reddy VN, Kantorow M, Cvekl A. Spectrum and range of oxidative stress responses of human lens epithelial cells to H<sub>2</sub>O<sub>2</sub> insult. *Investigative ophthalmology & visual science*. 2003; 44:2084–2093.
251. van Ginkel PR, Gee RL, Shearer RL, Subramanian L, Walker TM, Albert DM, Meisner LF, Varnum BC, Polans AS. Expression of the receptor tyrosine kinase Axl promotes ocular melanoma cell survival. *Cancer research*. 2004; 64:128–134.
252. Brodowska K, Al-Moujahed A, Marmalidou A, Meyer Zu Horste M, Cichy J, Miller JW, Gragoudas E, Vavvas DG. The clinically used photosensitizer Verteporfin (VP) inhibits YAP-TEAD and human retinoblastoma cell growth in vitro without light activation. *Experimental eye research*. 2014; 124:67–73.
253. Ito T, Ito M, Naito S, Ohtsuru A, Nagayama Y, Kanematsu T, Yamashita S, Sekine I. Expression of the Axl receptor tyrosine kinase in human thyroid carcinoma. *Thyroid: official journal of the American Thyroid Association*. 1999; 9:563–567.
254. Tanaka K, Nagayama Y, Nakano T, Takamura N, Namba H, Fukada S, Kuma K, Yamashita S, Niwa M. Expression profile of receptor-type protein tyrosine kinase genes in the human thyroid. *Endocrinology*. 1998; 139:852–858.
255. Ito M, Nakashima M, Nakayama T, Ohtsuru A, Nagayama Y, Takamura N, Demedchik EP, Sekine I, Yamashita S. Expression of receptor-type tyrosine kinase, Axl, and its ligand, Gas6, in pediatric thyroid carcinomas around chernobyl. *Thyroid: official journal of the American Thyroid Association*. 2002; 12:971–975.
256. Avilla E, Guarino V, Visciano C, Liotti F, Svelto M, Krishnamoorthy G, Franco R, Melillo RM. Activation of TYRO3/AXL tyrosine kinase receptors in thyroid cancer. *Cancer research*. 2011; 71:1792–1804.
257. Chaker S, Kashat L, Voisin S, Kaur J, Kak I, MacMillan C, Ozcelik H, Siu KW, Ralhan R, Walfish PG. Secretome proteins as candidate biomarkers for aggressive thyroid carcinomas. *Proteomics*. 2013; 13:771–787.
258. Craven RJ, Xu LH, Weiner TM, Fridell YW, Dent GA, Srivastava S, Varnum B, Liu ET, Cance WG. Receptor tyrosine kinases expressed in metastatic colon cancer. *International journal of cancer Journal international du cancer*. 1995; 60:791–797.
259. Chen WS, Kung HJ, Yang WK, Lin W. Comparative tyrosine-kinase profiles in colorectal cancers: enhanced arg expression in carcinoma as compared with adenoma and normal mucosa. *International journal of cancer Journal international du cancer*. 1999; 83:579–584.
260. Yuen HF, McCrudden CM, Huang YH, Tham JM, Zhang X, Zeng Q, Zhang SD, Hong W. TAZ expression as a prognostic indicator in colorectal cancer. *PLoS one*. 2013; 8:e54211.
261. Heckmann D, Maier P, Laufs S, Li L, Sleeman JP, Trunk MJ, Leupold JH, Wenz F, Zeller WJ, Fruehauf S, Allgayer H. The disparate twins: a comparative study of CXCR4 and CXCR7 in SDF-1 $\alpha$ -induced gene expression, invasion and chemosensitivity of colon cancer. *Clinical cancer research: an official journal of the American Association for Cancer Research*. 2014; 20:604–616.
262. Dunne PD, McArt DG, Blayney JK, Kalimutho M, Greer S, Wang T, Srivastava S, Ong CW, Arthur K, Loughrey M, Redmond K, Longley DB, Salto-Tellez M, Johnston PG, Van Schaeybroeck S. AXL is a key regulator of inherent and chemotherapy-induced invasion and predicts a poor clinical outcome in early-stage colon cancer. *Clinical cancer research: an official journal of the American Association for Cancer Research*. 2014; 20:164–175.
263. Mahadevan D, Cooke L, Riley C, Swart R, Simons B, Della Croce K, Wisner L, Iorio M, Shakalya K, Garewal H, Nagle R, Bearss D. A novel tyrosine kinase switch is a mechanism of imatinib resistance in gastrointestinal stromal tumors. *Oncogene*. 2007; 26:3909–3919.
264. Burbridge MF, Bossard CJ, Saunier C, Fejes I, Bruno A, Leonce S, Ferry G, Da Violante G, Bouzom F, Cattani V, Jacquet-Bescond A, Comoglio PM, Lockhart BP, Boutin JA,

- Cordi A, Ortuno JC, et al. S49076 is a novel kinase inhibitor of MET, AXL, and FGFR with strong preclinical activity alone and in association with bevacizumab. *Molecular cancer therapeutics*. 2013; 12:1749–1762.
265. Soderlund S, Brandt L, Lapidus A, Karlen P, Brostrom O, Lofberg R, Ekblom A, Askling J. Decreasing time-trends of colorectal cancer in a large cohort of patients with inflammatory bowel disease. *Gastroenterology*. 2009; 136:1561–1567quiz 1818–1569.
266. Couchie D, Lafdil F, Martin-Garcia N, Laperche Y, Zafrani ES, Mavier P. Expression and role of Gas6 protein and of its receptor Axl in hepatic regeneration from oval cells in the rat. *Gastroenterology*. 2005; 129:1633–1642.
267. Fausto N. Liver regeneration and repair: hepatocytes, progenitor cells, and stem cells. *Hepatology (Baltimore, Md)*. 2004; 39:1477–1487.
268. Michalopoulos GK, DeFrances MC. Liver regeneration. *Science (New York, NY)*. 1997; 276:60–66.
269. Lafdil F, Chobert MN, Couchie D, Brouillet A, Zafrani ES, Mavier P, Laperche Y. Induction of Gas6 protein in CCl4-induced rat liver injury and anti-apoptotic effect on hepatic stellate cells. *Hepatology (Baltimore, Md)*. 2006; 44:228–239.
270. Fourcot A, Couchie D, Chobert MN, Zafrani ES, Mavier P, Laperche Y, Brouillet A. Gas6 deficiency prevents liver inflammation, steatohepatitis, and fibrosis in mice. *American journal of physiology Gastrointestinal and liver physiology*. 2011; 300:G1043–1053.
271. Qi N, Liu P, Zhang Y, Wu H, Chen Y, Han D. Development of a spontaneous liver disease resembling autoimmune hepatitis in mice lacking tyro3, axl and mer receptor tyrosine kinases. *PloS one*. 2013; 8:e66604.
272. Tsou AP, Wu KM, Tsen TY, Chi CW, Chiu JH, Lui WY, Hu CP, Chang C, Chou CK, Tsai SF. Parallel hybridization analysis of multiple protein kinase genes: identification of gene expression patterns characteristic of human hepatocellular carcinoma. *Genomics*. 1998; 50:331–340.
273. Song B, Tang JW, Wang B, Cui XN, Zhou CH, Hou L. [Screening for lymphatic metastasis-associated genes in mouse hepatocarcinoma cell lines Hca-F and Hca-P using gene chip]. *Ai zheng = Aizheng = Chinese journal of cancer*. 2005; 24:774–780.
274. Xu J, Jia L, Ma H, Li Y, Ma Z, Zhao Y. Axl gene knock-down inhibits the metastasis properties of hepatocellular carcinoma via PI3K/Akt-PAK1 signal pathway. *Tumour biology: the journal of the International Society for Oncodevelopmental Biology and Medicine*. 2014; 35:3809–3817.
275. Lee HJ, Jeng YM, Chen YL, Chung L, Yuan RH. Gas6/Axl pathway promotes tumor invasion through the transcriptional activation of Slug in hepatocellular carcinoma. *Carcinogenesis*. 2014; 35:769–775.
276. Lin ZY, Chuang WL. Genes responsible for the characteristics of primary cultured invasive phenotype hepatocellular carcinoma cells. *Biomedicine & pharmacotherapy = Biomedecine & pharmacotherapie*. 2012; 66:454–458.
277. He L, Zhang J, Jiang L, Jin C, Zhao Y, Yang G, Jia L. Differential expression of Axl in hepatocellular carcinoma and correlation with tumor lymphatic metastasis. *Molecular carcinogenesis*. 2010; 49:882–891.
278. Li J, Jia L, Ma ZH, Ma QH, Yang XH, Zhao YF. Axl glycosylation mediates tumor cell proliferation, invasion and lymphatic metastasis in murine hepatocellular carcinoma. *World journal of gastroenterology: WJG*. 2012; 18:5369–5376.
279. Hsu SH, Wang B, Kutay H, Bid H, Shreve J, Zhang X, Costinean S, Bratasz A, Houghton P, Ghoshal K. Hepatic loss of miR-122 predisposes mice to hepatobiliary cyst and hepatocellular carcinoma upon diethylnitrosamine exposure. *The American journal of pathology*. 2013; 183:1719–1730.
280. Feneyrolles C, Spenlinhauer A, Guet L, Fauvel B, Dayde-Cazals B, Warnault P, Cheve G, Yasri A. Axl Kinase as a Key Target for Oncology: Focus on Small Molecule Inhibitors. *Molecular cancer therapeutics*. 2014.
281. Pao-Chun L, Chan PM, Chan W, Manser E. Cytoplasmic ACK1 interaction with multiple receptor tyrosine kinases is mediated by Grb2: an analysis of ACK1 effects on Axl signaling. *The Journal of biological chemistry*. 2009; 284:34954–34963.
282. Fridell YW, Jin Y, Quilliam LA, Burchert A, McCloskey P, Spizz G, Varnum B, Der C, Liu ET. Differential activation of the Ras/extracellular-signal-regulated protein kinase pathway is responsible for the biological consequences induced by the Axl receptor tyrosine kinase. *Molecular and cellular biology*. 1996; 16:135–145.
283. Cerchia L, Esposito CL, Camorani S, Rienzo A, Stasio L, Insabato L, Affuso A, de Francis V. Targeting Axl with an high-affinity inhibitory aptamer. *Molecular therapy: the journal of the American Society of Gene Therapy*. 2012; 20:2291–2303.
284. Lin CI, Whang EE, Moalem J, Ruan DT. Strategic combination therapy overcomes tyrosine kinase coactivation in adrenocortical carcinoma. *Surgery*. 2012; 152:1045–1050.
285. Yan SB, Peek VL, Ajamie R, Buchanan SG, Graff JR, Heidler SA, Hui YH, Huss KL, Konicek BW, Manro JR, Shih C, Stewart JA, Stewart TR, Stout SL, Uhlik MT, Um SL, et al. LY2801653 is an orally bioavailable multi-kinase inhibitor with potent activity against MET, MST1R, and other oncoproteins, and displays anti-tumor

- activities in mouse xenograft models. *Investigational new drugs*. 2013; 31:833–844.
286. Torika R, Penzes K, Gusenbauer S, Baumann C, Szabadkai I, Orfi L, Keri G, Ullrich A. Activation of HER3 interferes with antitumor effects of Axl receptor tyrosine kinase inhibitors: suggestion of combination therapy. *Neoplasia* (New York, NY). 2014; 16:301–318.
287. Yakes FM, Chen J, Tan J, Yamaguchi K, Shi Y, Yu P, Qian F, Chu F, Bentzien F, Cancilla B, Orf J, You A, Laird AD, Engst S, Lee L, Lesch J, et al. Cabozantinib (XL184), a novel MET and VEGFR2 inhibitor, simultaneously suppresses metastasis, angiogenesis, and tumor growth. *Molecular cancer therapeutics*. 2011; 10:2298–2308.
